# Supplementary material for: Revision of the genus Pseudapanteles (Hymenoptera, Braconidae, Microgastrinae), with emphasis on the species in Area de Conservación Guanacaste, northwestern Costa Rica
Source: Zookeys. 2014 Oct 14;(446):1–82. doi: 10.3897/zookeys.446.8195 (PMC4205727; doi:10.3897/zookeys.446.8195)
Supplement: Supplementary material 2 — All sequence and specimen information [file zookeys-446-001-s002.xls]

## Sheet: Supplemental Appendix 2
Supplemental Appendix 2: All sequence and specimen information
Fernandez Triana et al.
Sample ID	Process ID	Field ID	BIN	COI-5P Seq. Length	COI-5P # ambiguities	COI-5P Trace Count	GenBank COI-5P Accession	Image Count	Barcode Compliant	Genus	Species	Identifier	Identifier email	Extra Info	Notes	Collectors	Collection Date	Country/Ocean	State/Province	Region	Sector	Exact Site	Lat	Lon	Elev
DHJPAR0047117	ACGBA1260-12	11-SRNP-76958	BOLD:AAE8275	658	0	2	KJ840819	0	Yes	Pseudapanteles	Pseudapanteles ruficolis	Daniel H. Janzen	djanzen@sas.upenn.edu	Desmia ufeus	Crambidae	Mercedes Moraga	01-Jan-2012	Costa Rica	Guanacaste	Area de Conservacion Guanacaste	Sector Rincon Rain Forest	Estacion Llanura	10.933	-85.253	135
DHJPAR0051798	ACGBA4390-13	13-SRNP-75584	BOLD:AAE8275	658	0	2	KJ840809	0	Yes	Pseudapanteles	Pseudapanteles ruficolis	Daniel H. Janzen	djanzen@sas.upenn.edu					Costa Rica
DHJPAR0012575	ASBD082-07	99-SRNP-18903	BOLD:AAB2826	657	0	2	JQ847158	0	Yes	Pseudapanteles	Pseudapanteles rosemarykarpinskiae	Daniel H. Janzen	djanzen@sas.upenn.edu	malaise-trapped	99-SRNP-18903 | malaise-trapped	D.H.Janzen&W.Hallwachs		Costa Rica	Guanacaste	Area de Conservacion Guanacaste	Sector El Hacha	Sendero Bejuquilla	11.03	-85.527	280
DHJPAR0004755	ASBR765-06	06-SRNP-1974	BOLD:AAK9732	604	2	2	JQ847890	0	Yes	Pseudapanteles	Pseudapanteles carlosespinachi			Desmia Solis100DHJ01	06-SRNP-1974 | Crambidae	Gloria Sihezar	02-Apr-2006	Costa Rica	Alajuela	Area de Conservacion Guanacaste	Sector San Cristobal	Rio Blanco Abajo	10.9004	-85.3725	500
DHJPAR0013427	ASBRD300-07	00-SRNP-24008	BOLD:AAA6667	657	0	2	JQ851319	0	Yes	Pseudapanteles	Pseudapanteles raulsolorzanoi	Daniel H. Janzen	djanzen@sas.upenn.edu	malaise-trapped	00-SRNP-24008 | malaise-trapped	D.H.Janzen&W.Hallwachs		Costa Rica	Guanacaste	Area de Conservacion Guanacaste	Sector Santa Rosa	Bosque Humedo	10.8514	-85.608	290
DHJPAR0025826	ASHYB165-08	07-SRNP-67288	BOLD:AAA2445	634	1	2	JQ848307	0	Yes	Pseudapanteles	Pseudapanteles margaritapenonae	Daniel H. Janzen	djanzen@sas.upenn.edu	malaise-trapped	07-SRNP-67288 | malaise-trapped	D.H.Janzen&W.Hallwachs		Costa Rica	Alajuela	Area de Conservacion Guanacaste	Sector San Cristobal	Estacion San Gerardo	10.8801	-85.3889	575
DHJPAR0025830	ASHYB169-08	07-SRNP-67292	BOLD:AAA2445	654	1	2	JQ846999	0	Yes	Pseudapanteles	Pseudapanteles margaritapenonae	Daniel H. Janzen	djanzen@sas.upenn.edu	malaise-trapped	07-SRNP-67292 | malaise-trapped	D.H.Janzen&W.Hallwachs		Costa Rica	Alajuela	Area de Conservacion Guanacaste	Sector San Cristobal	Estacion San Gerardo	10.8801	-85.3889	575
DHJPAR0026247	ASHYC270-08	08-SRNP-41804	BOLD:AAA2445	621	1	2	JQ851594	0	Yes	Pseudapanteles	Pseudapanteles margaritapenonae	Daniel H. Janzen	djanzen@sas.upenn.edu	malaise-trapped	08-SRNP-41804 | malaise-trapped	D.H.Janzen&W.Hallwachs		Costa Rica	Alajuela	Area de Conservacion Guanacaste	Sector Rincon Rainforest	Vado Rio Francia	10.9009	-85.2891	400
DHJPAR0026390	ASHYC413-08	07-SRNP-67695	BOLD:AAA2445	654	3	2	JQ851096	0	Yes	Pseudapanteles	Pseudapanteles margaritapenonae	Daniel H. Janzen	djanzen@sas.upenn.edu	malaise-trapped	07-SRNP-67695 | malaise-trapped	D.H.Janzen&W.Hallwachs		Costa Rica	Alajuela	Area de Conservacion Guanacaste	Sector San Cristobal	Rio Blanco Abajo	10.9004	-85.3725	500
DHJPAR0026526	ASHYC549-08	08-SRNP-2945	BOLD:AAA2445	657	0	2	JQ850184	0	Yes	Pseudapanteles	Pseudapanteles margaritapenonae	Daniel H. Janzen	djanzen@sas.upenn.edu	malaise-trapped	08-SRNP-2945 | malaise-trapped	D.H.Janzen&W.Hallwachs		Costa Rica	Alajuela	Area de Conservacion Guanacaste	Sector San Cristobal	Rio Blanco Abajo	10.9004	-85.3725	500
DHJPAR0031742	ASHYD1666-10	08-SRNP-76183	BOLD:AAK9744	658	0	2	HQ548880	0	Yes	Pseudapanteles	Pseudapanteles hernanbravoi			malaise-trapped	08-SRNP-76183 | malaise-trapped	D.H.Janzen&W.Hallwachs		Costa Rica	Guanacaste	Area de Conservacion Guanacaste	Sector Santa Rosa	Area Administrativa	10.8376	-85.6187	295
DHJPAR0031765	ASHYD1689-10	08-SRNP-76206	BOLD:ABX9145	626	0	4	KJ840798	0	Yes	Pseudapanteles	Pseudapanteles renecastroi	Daniel H. Janzen	djanzen@sas.upenn.edu	malaise-trapped	08-SRNP-76206 | malaise-trapped	D.H.Janzen&W.Hallwachs		Costa Rica	Guanacaste	Area de Conservacion Guanacaste	Sector Santa Rosa	Area Administrativa	10.8376	-85.6187	295
DHJPAR0027206	ASHYD232-08	08-SRNP-3625	BOLD:AAA2445	580	1	2	JQ854442	0	Yes	Pseudapanteles	Pseudapanteles margaritapenonae	Daniel H. Janzen	djanzen@sas.upenn.edu	malaise-trapped	08-SRNP-3625 | malaise-trapped	D.H.Janzen&W.Hallwachs		Costa Rica	Alajuela	Area de Conservacion Guanacaste	Sector San Cristobal	Rio Blanco Abajo	10.9004	-85.3725	500
DHJPAR0027212	ASHYD238-08	08-SRNP-3631	BOLD:AAA2445	596	2	2	JQ847051	0	Yes	Pseudapanteles	Pseudapanteles margaritapenonae	Daniel H. Janzen	djanzen@sas.upenn.edu	malaise-trapped	08-SRNP-3631 | malaise-trapped	D.H.Janzen&W.Hallwachs		Costa Rica	Alajuela	Area de Conservacion Guanacaste	Sector San Cristobal	Rio Blanco Abajo	10.9004	-85.3725	500
DHJPAR0027242	ASHYD268-08	08-SRNP-3661	BOLD:AAA6668	620	3	1	JQ853811	0	No	Pseudapanteles	Pseudapanteles christianafigueresae	Daniel H. Janzen	djanzen@sas.upenn.edu	malaise-trapped	08-SRNP-3661 | malaise-trapped	D.H.Janzen&W.Hallwachs		Costa Rica	Alajuela	Area de Conservacion Guanacaste	Sector San Cristobal	Rio Blanco Abajo	10.9004	-85.3725	500
DHJPAR0027668	ASHYD694-08	08-SRNP-3966		618	9	2	JQ848135	0	No	Pseudapanteles	Pseudapanteles margaritapenonae	Daniel H. Janzen	djanzen@sas.upenn.edu	malaise-trapped	08-SRNP-3966 | malaise-trapped	D.H.Janzen&W.Hallwachs		Costa Rica	Alajuela	Area de Conservacion Guanacaste	Sector San Cristobal	Bosque Trampa Malaise	10.8628	-85.3846	815
DHJPAR0033762	ASHYG032-10	08-SRNP-37681	BOLD:AAE0922	658	0	2	HQ549608	0	Yes	Pseudapanteles	Pseudapanteles alvaroumanai	Daniel H. Janzen	djanzen@sas.upenn.edu	malaise-trapped	08-SRNP-37681 | malaise-trapped	D.H.Janzen&W.Hallwachs		Costa Rica	Guanacaste	Area de Conservacion Guanacaste	Sector Cacao	Cerro Pedregal	10.9277	-85.4745	1080
DHJPAR0033903	ASHYG173-10	08-SRNP-37822	BOLD:AAE0922	658	0	2	HQ549733	0	Yes	Pseudapanteles	Pseudapanteles alvaroumanai	Daniel H. Janzen	djanzen@sas.upenn.edu	malaise-trapped	08-SRNP-37822 | malaise-trapped	D.H.Janzen&W.Hallwachs		Costa Rica	Guanacaste	Area de Conservacion Guanacaste	Sector Cacao	Sendero Arenales	10.9247	-85.4674	1080
DHJPAR0034081	ASHYG351-10	08-SRNP-38000	BOLD:AAK9737	658	0	2	HQ549888	0	Yes	Pseudapanteles	Pseudapanteles analorenaguevarae			malaise-trapped	08-SRNP-38000 | malaise-trapped	D.H.Janzen&W.Hallwachs		Costa Rica	Guanacaste	Area de Conservacion Guanacaste	Sector Cacao	Sendero Cima	10.9333	-85.4573	1460
DHJPAR0031191	ASHYG452-10	08-SRNP-38101	BOLD:AAK9737	658	0	2	HQ549955	0	Yes	Pseudapanteles	Pseudapanteles analorenaguevarae			malaise-trapped	08-SRNP-38101 | malaise-trapped	D.H.Janzen&W.Hallwachs		Costa Rica	Guanacaste	Area de Conservacion Guanacaste	Sector Cacao	Sendero Circular	10.9271	-85.4668	1185
DHJPAR0031220	ASHYG481-10	08-SRNP-38130	BOLD:AAE0922	658	0	2	HQ549982	0	Yes	Pseudapanteles	Pseudapanteles alvaroumanai	Daniel H. Janzen	djanzen@sas.upenn.edu	malaise-trapped	08-SRNP-38130 | malaise-trapped	D.H.Janzen&W.Hallwachs		Costa Rica	Guanacaste	Area de Conservacion Guanacaste	Sector Cacao	Sendero Circular	10.9271	-85.4668	1185
DHJPAR0031302	ASHYG563-10	08-SRNP-38212	BOLD:AAK9737	658	0	2	HQ550059	0	Yes	Pseudapanteles	Pseudapanteles analorenaguevarae	Daniel H. Janzen	djanzen@sas.upenn.edu	malaise-trapped	08-SRNP-38212 | malaise-trapped	D.H.Janzen&W.Hallwachs		Costa Rica	Guanacaste	Area de Conservacion Guanacaste	Sector Cacao	Sendero Arenales	10.9247	-85.4674	1080
DHJPAR0031698	ASHYG959-10	08-SRNP-76139	BOLD:AAB2826	658	0	2	HQ550387	0	Yes	Pseudapanteles	Pseudapanteles rosemarykarpinskiae	Daniel H. Janzen	djanzen@sas.upenn.edu	malaise-trapped	08-SRNP-76139 | malaise-trapped	D.H.Janzen&W.Hallwachs		Costa Rica	Guanacaste	Area de Conservacion Guanacaste	Sector Santa Rosa	Area Administrativa	10.8376	-85.6187	295
DHJPAR0043058	ASHYH816-11	11-SRNP-696	BOLD:ABA7261	658	0	2	JQ576585	0	Yes	Pseudapanteles	Pseudapanteles Whitfield27			Eulepte Solis	11-SRNP-696 | Crambidae	Elda Araya	01-Mar-2011	Costa Rica	Guanacaste	Area de Conservacion Guanacaste	Sector San Cristobal	Tajo Angeles	10.865	-85.415	540
DHJPAR0053022	ASHYM2376-13	13-SRNP-68398	BOLD:AAH8195	658	0	2	KJ840807	0	Yes	Pseudapanteles	Pseudapanteles mariocarvajali	Daniel H. Janzen	djanzen@sas.upenn.edu	Stenoma Janzen373	Elachistidae	keiner Aragon	11-Jun-2013	Costa Rica	Guanacaste	Area de Conservacion Guanacaste	Sector Rincon Rain Forest	Palomo
DHJPAR0013654	ASBD519-07	99-SRNP-19267	BOLD:AAE0922	604	0	2	JQ853555	0	Yes	Pseudapanteles	Pseudapanteles alvaroumanai	Daniel H. Janzen	djanzen@sas.upenn.edu	malaise-trapped	99-SRNP-19267 | malaise-trapped	D.H.Janzen&W.Hallwachs		Costa Rica	Guanacaste	Area de Conservacion Guanacaste	Sector El Hacha	Sendero Bejuquilla	11.03	-85.527	280
DHJPAR0013247	ASBRD213-07	07-SRNP-15046	BOLD:AAB2826	657	0	2	JQ855446	0	Yes	Pseudapanteles	Pseudapanteles rosemarykarpinskiae	Daniel H. Janzen	djanzen@sas.upenn.edu	yellow pan-trapped	07-SRNP-15046 | yellow pan-trapped	A. R. Deans		Costa Rica	Guanacaste	Area de Conservacion Guanacaste	Sector Santa Rosa	Bosque San Emilio	10.8439	-85.6138	300
DHJPAR0013238	ASBRD229-07	98-SRNP-16117	BOLD:AAX8739	655	2	2	JQ848380	0	Yes	Pseudapanteles	Pseudapanteles soniapicadoae	Daniel H. Janzen	djanzen@sas.upenn.edu	malaise-trapped	98-SRNP-16117 | malaise-trapped	D.H.Janzen&W.Hallwachs		Costa Rica	Guanacaste	Area de Conservacion Guanacaste	Sector Santa Rosa	Bosque Humedo	10.8514	-85.608	290
DHJPAR0013411	ASBRD312-07	00-SRNP-24021	BOLD:AAA6667	657	0	2	JQ852842	0	Yes	Pseudapanteles	Pseudapanteles raulsolorzanoi	Daniel H. Janzen	djanzen@sas.upenn.edu	malaise-trapped	00-SRNP-24021 | malaise-trapped	D.H.Janzen&W.Hallwachs		Costa Rica	Guanacaste	Area de Conservacion Guanacaste	Sector Santa Rosa	Bosque Humedo	10.8514	-85.608	290
DHJPAR0012880	ASBRD515-07	07-SRNP-700	BOLD:AAE8275	657	0	2	JQ850735	0	Yes	Pseudapanteles	Pseudapanteles ruficolis	Daniel H. Janzen	djanzen@sas.upenn.edu	see description	07-SRNP-700 | Crambidae	Elda Araya	01-Mar-2007	Costa Rica	Alajuela	Area de Conservacion Guanacaste	Sector San Cristobal	Puente Palma	10.9163	-85.3787	460
DHJPAR0025895	ASHYB234-08	07-SRNP-67357		600	7	2	JQ853985	0	No	Pseudapanteles	Pseudapanteles christianafigueresae	Daniel H. Janzen	djanzen@sas.upenn.edu	malaise-trapped	07-SRNP-67357 | malaise-trapped	D.H.Janzen&W.Hallwachs		Costa Rica	Alajuela	Area de Conservacion Guanacaste	Sector San Cristobal	Bosque Trampa Malaise	10.8628	-85.3846	815
DHJPAR0025932	ASHYB271-08	07-SRNP-67394		556	7	2	JQ852205	0	No	Pseudapanteles	Pseudapanteles mariobozai	Daniel H. Janzen	djanzen@sas.upenn.edu	malaise-trapped	07-SRNP-67394 | malaise-trapped	D.H.Janzen&W.Hallwachs		Costa Rica	Alajuela	Area de Conservacion Guanacaste	Sector San Cristobal	Bosque Trampa Malaise	10.8628	-85.3846	815
DHJPAR0026107	ASHYC130-08	07-SRNP-67577	BOLD:AAA2445	631	0	2	JQ848018	0	Yes	Pseudapanteles	Pseudapanteles margaritapenonae	Daniel H. Janzen	djanzen@sas.upenn.edu	malaise-trapped	07-SRNP-67577 | malaise-trapped	D.H.Janzen&W.Hallwachs		Costa Rica	Alajuela	Area de Conservacion Guanacaste	Sector Rincon Rainforest	Vado Rio Francia	10.9009	-85.2891	400
DHJPAR0026514	ASHYC537-08	08-SRNP-2933	BOLD:AAA2445	657	0	2	JQ850457	0	Yes	Pseudapanteles	Pseudapanteles margaritapenonae	Daniel H. Janzen	djanzen@sas.upenn.edu	malaise-trapped	08-SRNP-2933 | malaise-trapped	D.H.Janzen&W.Hallwachs		Costa Rica	Alajuela	Area de Conservacion Guanacaste	Sector San Cristobal	Rio Blanco Abajo	10.9004	-85.3725	500
DHJPAR0026623	ASHYC646-08	08-SRNP-3042	BOLD:AAA2445	657	0	0	JQ852665	0	No	Pseudapanteles	Pseudapanteles margaritapenonae	Daniel H. Janzen	djanzen@sas.upenn.edu	malaise-trapped	08-SRNP-3042 | malaise-trapped	D.H.Janzen&W.Hallwachs		Costa Rica	Alajuela	Area de Conservacion Guanacaste	Sector San Cristobal	Rio Blanco Abajo	10.9004	-85.3725	500
DHJPAR0026717	ASHYC740-08	08-SRNP-3136	BOLD:AAA6668	654	3	0	JQ851133	0	No	Pseudapanteles	Pseudapanteles christianafigueresae	Daniel H. Janzen	djanzen@sas.upenn.edu	malaise-trapped	08-SRNP-3136 | malaise-trapped	D.H.Janzen&W.Hallwachs		Costa Rica	Alajuela	Area de Conservacion Guanacaste	Sector San Cristobal	Rio Blanco Abajo	10.9004	-85.3725	500
DHJPAR0026771	ASHYC794-08	08-SRNP-3190	BOLD:AAA2445	631	0	2	JQ848119	0	Yes	Pseudapanteles	Pseudapanteles margaritapenonae	Daniel H. Janzen	djanzen@sas.upenn.edu	malaise-trapped	08-SRNP-3190 | malaise-trapped	D.H.Janzen&W.Hallwachs		Costa Rica	Alajuela	Area de Conservacion Guanacaste	Sector San Cristobal	Rio Blanco Abajo	10.9004	-85.3725	500
DHJPAR0026884	ASHYC907-08	08-SRNP-3303	BOLD:AAA2445	610	3	1	JQ852754	0	No	Pseudapanteles	Pseudapanteles margaritapenonae	Daniel H. Janzen	djanzen@sas.upenn.edu	malaise-trapped	08-SRNP-3303 | malaise-trapped	D.H.Janzen&W.Hallwachs		Costa Rica	Alajuela	Area de Conservacion Guanacaste	Sector San Cristobal	Rio Blanco Abajo	10.9004	-85.3725	500
DHJPAR0027036	ASHYD062-08	08-SRNP-3455	BOLD:AAA2445	657	0	2	JQ850755	0	Yes	Pseudapanteles	Pseudapanteles margaritapenonae	Daniel H. Janzen	djanzen@sas.upenn.edu	malaise-trapped	08-SRNP-3455 | malaise-trapped	D.H.Janzen&W.Hallwachs		Costa Rica	Alajuela	Area de Conservacion Guanacaste	Sector San Cristobal	Rio Blanco Abajo	10.9004	-85.3725	500
DHJPAR0031754	ASHYD1678-10	08-SRNP-76195	BOLD:AAB2826	658	0	2	HQ548891	0	Yes	Pseudapanteles	Pseudapanteles rosemarykarpinskiae	Daniel H. Janzen	djanzen@sas.upenn.edu	malaise-trapped	08-SRNP-76195 | malaise-trapped	D.H.Janzen&W.Hallwachs		Costa Rica	Guanacaste	Area de Conservacion Guanacaste	Sector Santa Rosa	Area Administrativa	10.8376	-85.6187	295
DHJPAR0027162	ASHYD188-08	08-SRNP-3581	BOLD:AAA2445	590	1	2	JQ853643	0	Yes	Pseudapanteles	Pseudapanteles margaritapenonae	Daniel H. Janzen	djanzen@sas.upenn.edu	malaise-trapped	08-SRNP-3581 | malaise-trapped	D.H.Janzen&W.Hallwachs		Costa Rica	Alajuela	Area de Conservacion Guanacaste	Sector San Cristobal	Rio Blanco Abajo	10.9004	-85.3725	500
DHJPAR0027353	ASHYD379-08	08-SRNP-3772	BOLD:AAA2445	656	1	2	JQ854824	0	Yes	Pseudapanteles	Pseudapanteles margaritapenonae	Daniel H. Janzen	djanzen@sas.upenn.edu	malaise-trapped	08-SRNP-3772 | malaise-trapped	D.H.Janzen&W.Hallwachs		Costa Rica	Alajuela	Area de Conservacion Guanacaste	Sector San Cristobal	Rio Blanco Abajo	10.9004	-85.3725	500
DHJPAR0027425	ASHYD451-08	08-SRNP-3844	BOLD:AAA2445	615	1	2	JQ847202	0	Yes	Pseudapanteles	Pseudapanteles margaritapenonae	Daniel H. Janzen	djanzen@sas.upenn.edu	malaise-trapped	08-SRNP-3844 | malaise-trapped	D.H.Janzen&W.Hallwachs		Costa Rica	Alajuela	Area de Conservacion Guanacaste	Sector San Cristobal	Rio Blanco Abajo	10.9004	-85.3725	500
DHJPAR0027614	ASHYD640-08	07-SRNP-67818		516	21	2	JQ849992	0	No	Pseudapanteles	Pseudapanteles margaritapenonae	Daniel H. Janzen	djanzen@sas.upenn.edu	malaise-trapped	07-SRNP-67818 | malaise-trapped	D.H.Janzen&W.Hallwachs		Costa Rica	Alajuela	Area de Conservacion Guanacaste	Sector San Cristobal	Bosque Trampa Malaise	10.8628	-85.3846	815
DHJPAR0027664	ASHYD690-08	08-SRNP-3962	BOLD:AAA6668	589	0	2	JQ850536	0	Yes	Pseudapanteles	Pseudapanteles christianafigueresae	Daniel H. Janzen	djanzen@sas.upenn.edu	malaise-trapped	08-SRNP-3962 | malaise-trapped	D.H.Janzen&W.Hallwachs		Costa Rica	Alajuela	Area de Conservacion Guanacaste	Sector San Cristobal	Bosque Trampa Malaise	10.8628	-85.3846	815
DHJPAR0027689	ASHYD715-08	08-SRNP-3987	BOLD:AAA6668	629	0	2	JQ853947	0	Yes	Pseudapanteles	Pseudapanteles christianafigueresae	Daniel H. Janzen	djanzen@sas.upenn.edu	malaise-trapped	08-SRNP-3987 | malaise-trapped	D.H.Janzen&W.Hallwachs		Costa Rica	Alajuela	Area de Conservacion Guanacaste	Sector San Cristobal	Bosque Trampa Malaise	10.8628	-85.3846	815
DHJPAR0027691	ASHYD717-08	08-SRNP-3989	BOLD:AAA6668	630	1	2	JQ855163	0	Yes	Pseudapanteles	Pseudapanteles christianafigueresae	Daniel H. Janzen	djanzen@sas.upenn.edu	malaise-trapped	08-SRNP-3989 | malaise-trapped	D.H.Janzen&W.Hallwachs		Costa Rica	Alajuela	Area de Conservacion Guanacaste	Sector San Cristobal	Bosque Trampa Malaise	10.8628	-85.3846	815
DHJPAR0031187	ASHYG448-10	08-SRNP-38097	BOLD:AAK9737	658	0	2	HQ549951	0	Yes	Pseudapanteles	Pseudapanteles analorenaguevarae	Daniel H. Janzen	djanzen@sas.upenn.edu	malaise-trapped	08-SRNP-38097 | malaise-trapped	D.H.Janzen&W.Hallwachs		Costa Rica	Guanacaste	Area de Conservacion Guanacaste	Sector Cacao	Sendero Circular	10.9271	-85.4668	1185
DHJPAR0031307	ASHYG568-10	08-SRNP-38217	BOLD:AAK9737	658	0	2	HQ550063	0	Yes	Pseudapanteles	Pseudapanteles analorenaguevarae	Daniel H. Janzen	djanzen@sas.upenn.edu	malaise-trapped	08-SRNP-38217 | malaise-trapped	D.H.Janzen&W.Hallwachs		Costa Rica	Guanacaste	Area de Conservacion Guanacaste	Sector Cacao	Sendero Arenales	10.9247	-85.4674	1080
DHJPAR0052983	ASHYM2337-13	13-SRNP-42594	BOLD:ACB2343	658	0	2	KJ840823	0	Yes	Pseudapanteles	Pseudapanteles Janzen02	Daniel H. Janzen	djanzen@sas.upenn.edu	spiloBioLep01 BioLep414	Crambidae	Jose Perez	18-Jul-2013	Costa Rica	Guanacaste	Area de Conservacion Guanacaste	Sector Rincon Rain Forest	Estacion Caribe
DHJPAR0013549	ASBD414-07	99-SRNP-19049	BOLD:AAE8274	631	0	2	JQ852342	0	Yes	Pseudapanteles	Pseudapanteles carlosrodriguezi	Daniel H. Janzen	djanzen@sas.upenn.edu	malaise-trapped	99-SRNP-19049 | malaise-trapped	D.H.Janzen&W.Hallwachs		Costa Rica	Guanacaste	Area de Conservacion Guanacaste	Sector Santa Rosa	Bosque San Emilio	10.8439	-85.6138	300
DHJPAR0013605	ASBD470-07	00-SRNP-23979	BOLD:AAA6667	570	0	2	JQ853071	0	Yes	Pseudapanteles	Pseudapanteles raulsolorzanoi	Daniel H. Janzen	djanzen@sas.upenn.edu	malaise-trapped	00-SRNP-23979 | malaise-trapped	D.H.Janzen&W.Hallwachs		Costa Rica	Guanacaste	Area de Conservacion Guanacaste	Sector Santa Rosa	Bosque Humedo	10.8514	-85.608	290
DHJPAR0013236	ASBRD220-07	07-SRNP-15053	BOLD:AAB2826	657	0	2	JQ847452	0	Yes	Pseudapanteles	Pseudapanteles rosemarykarpinskiae	Daniel H. Janzen	djanzen@sas.upenn.edu	yellow pan-trapped	07-SRNP-15053 | yellow pan-trapped	A. R. Deans		Costa Rica	Guanacaste	Area de Conservacion Guanacaste	Sector Santa Rosa	Bosque San Emilio	10.8439	-85.6138	300
DHJPAR0013405	ASBRD315-07	00-SRNP-24026	BOLD:AAA6667	657	0	2	JQ850777	0	Yes	Pseudapanteles	Pseudapanteles raulsolorzanoi	Daniel H. Janzen	djanzen@sas.upenn.edu	malaise-trapped	00-SRNP-24026 | malaise-trapped	D.H.Janzen&W.Hallwachs		Costa Rica	Guanacaste	Area de Conservacion Guanacaste	Sector Santa Rosa	Bosque Humedo	10.8514	-85.608	290
DHJPAR0024675	ASHYA014-08	98-SRNP-16185		406	0	2	JQ855422	0	No	Pseudapanteles	Pseudapanteles raulsolorzanoi	Daniel H. Janzen	djanzen@sas.upenn.edu	malaise-trapped	98-SRNP-16185 | malaise-trapped	D.H.Janzen&W.Hallwachs		Costa Rica	Guanacaste	Area de Conservacion Guanacaste	Sector Santa Rosa	Bosque Humedo	10.8514	-85.608	290
DHJPAR0025345	ASHYA684-08	07-SRNP-66807	BOLD:AAF6107	635	0	2	JQ848147	0	Yes	Pseudapanteles	Pseudapanteles alfiopivai			malaise-trapped	07-SRNP-66807 | malaise-trapped	D.H.Janzen&W.Hallwachs		Costa Rica	Alajuela	Area de Conservacion Guanacaste	Sector San Cristobal	Rio Blanco Abajo	10.9004	-85.3725	500
DHJPAR0025866	ASHYB205-08	07-SRNP-67328	BOLD:AAA2445	652	5	2	JQ852886	0	Yes	Pseudapanteles	Pseudapanteles margaritapenonae			malaise-trapped	07-SRNP-67328 | malaise-trapped	D.H.Janzen&W.Hallwachs		Costa Rica	Alajuela	Area de Conservacion Guanacaste	Sector San Cristobal	Estacion San Gerardo	10.8801	-85.3889	575
DHJPAR0025952	ASHYB291-08	07-SRNP-67414	BOLD:AAA2445	657	0	2	JQ848117	0	Yes	Pseudapanteles	Pseudapanteles margaritapenonae	Daniel H. Janzen	djanzen@sas.upenn.edu	malaise-trapped	07-SRNP-67414 | malaise-trapped	D.H.Janzen&W.Hallwachs		Costa Rica	Alajuela	Area de Conservacion Guanacaste	Sector San Cristobal	Bosque Trampa Malaise	10.8628	-85.3846	815
DHJPAR0026008	ASHYB441-08	07-SRNP-67470	BOLD:AAA2445	638	0	2	JQ853286	0	Yes	Pseudapanteles	Pseudapanteles margaritapenonae			malaise-trapped	07-SRNP-67470 | malaise-trapped	D.H.Janzen&W.Hallwachs		Costa Rica	Alajuela	Area de Conservacion Guanacaste	Sector San Cristobal	Bosque Trampa Malaise	10.8628	-85.3846	815
DHJPAR0026549	ASHYC572-08	08-SRNP-2968	BOLD:AAA2445	656	1	2	JQ849489	0	Yes	Pseudapanteles	Pseudapanteles margaritapenonae	Daniel H. Janzen	djanzen@sas.upenn.edu	malaise-trapped	08-SRNP-2968 | malaise-trapped	D.H.Janzen&W.Hallwachs		Costa Rica	Alajuela	Area de Conservacion Guanacaste	Sector San Cristobal	Rio Blanco Abajo	10.9004	-85.3725	500
DHJPAR0026744	ASHYC767-08	08-SRNP-3163	BOLD:AAA2445	657	0	0	JQ847696	0	No	Pseudapanteles	Pseudapanteles margaritapenonae	Daniel H. Janzen	djanzen@sas.upenn.edu	malaise-trapped	08-SRNP-3163 | malaise-trapped	D.H.Janzen&W.Hallwachs		Costa Rica	Alajuela	Area de Conservacion Guanacaste	Sector San Cristobal	Rio Blanco Abajo	10.9004	-85.3725	500
DHJPAR0026878	ASHYC901-08	08-SRNP-3297	BOLD:AAA2445	421	0	4	JQ849036	0	No	Pseudapanteles	Pseudapanteles margaritapenonae	Daniel H. Janzen	djanzen@sas.upenn.edu	malaise-trapped	08-SRNP-3297 | malaise-trapped	D.H.Janzen&W.Hallwachs		Costa Rica	Alajuela	Area de Conservacion Guanacaste	Sector San Cristobal	Rio Blanco Abajo	10.9004	-85.3725	500
DHJPAR0026972	ASHYC995-08	08-SRNP-3391	BOLD:AAA2445	636	0	2	JQ854108	0	Yes	Pseudapanteles	Pseudapanteles margaritapenonae	Daniel H. Janzen	djanzen@sas.upenn.edu	malaise-trapped	08-SRNP-3391 | malaise-trapped	D.H.Janzen&W.Hallwachs		Costa Rica	Alajuela	Area de Conservacion Guanacaste	Sector San Cristobal	Rio Blanco Abajo	10.9004	-85.3725	500
DHJPAR0026995	ASHYD021-08	08-SRNP-3414	BOLD:AAA2445	657	0	2	JQ848670	0	Yes	Pseudapanteles	Pseudapanteles margaritapenonae	Daniel H. Janzen	djanzen@sas.upenn.edu	malaise-trapped	08-SRNP-3414 | malaise-trapped	D.H.Janzen&W.Hallwachs		Costa Rica	Alajuela	Area de Conservacion Guanacaste	Sector San Cristobal	Rio Blanco Abajo	10.9004	-85.3725	500
DHJPAR0027138	ASHYD164-08	08-SRNP-3557	BOLD:AAA6668	592	1	2	JQ849337	0	Yes	Pseudapanteles	Pseudapanteles christianafigueresae	Daniel H. Janzen	djanzen@sas.upenn.edu	malaise-trapped	08-SRNP-3557 | malaise-trapped	D.H.Janzen&W.Hallwachs		Costa Rica	Alajuela	Area de Conservacion Guanacaste	Sector San Cristobal	Rio Blanco Abajo	10.9004	-85.3725	500
DHJPAR0027150	ASHYD176-08	08-SRNP-3569	BOLD:AAA2445	600	0	2	JQ848150	0	Yes	Pseudapanteles	Pseudapanteles margaritapenonae			malaise-trapped	08-SRNP-3569 | malaise-trapped	D.H.Janzen&W.Hallwachs		Costa Rica	Alajuela	Area de Conservacion Guanacaste	Sector San Cristobal	Rio Blanco Abajo	10.9004	-85.3725	500
DHJPAR0027329	ASHYD355-08	08-SRNP-3748	BOLD:AAH8194	657	0	2	JQ849256	0	Yes	Pseudapanteles	Pseudapanteles pedroleoni			malaise-trapped	08-SRNP-3748 | malaise-trapped	D.H.Janzen&W.Hallwachs		Costa Rica	Alajuela	Area de Conservacion Guanacaste	Sector San Cristobal	Rio Blanco Abajo	10.9004	-85.3725	500
DHJPAR0027376	ASHYD402-08	08-SRNP-3795	BOLD:AAA2445	642	0	2	JQ848299	0	Yes	Pseudapanteles	Pseudapanteles margaritapenonae	Daniel H. Janzen	djanzen@sas.upenn.edu	malaise-trapped	08-SRNP-3795 | malaise-trapped	D.H.Janzen&W.Hallwachs		Costa Rica	Alajuela	Area de Conservacion Guanacaste	Sector San Cristobal	Rio Blanco Abajo	10.9004	-85.3725	500
DHJPAR0027455	ASHYD481-08	08-SRNP-3874	BOLD:AAA2445	657	0	2	JQ846548	0	Yes	Pseudapanteles	Pseudapanteles margaritapenonae	Daniel H. Janzen	djanzen@sas.upenn.edu	malaise-trapped	08-SRNP-3874 | malaise-trapped	D.H.Janzen&W.Hallwachs		Costa Rica	Alajuela	Area de Conservacion Guanacaste	Sector San Cristobal	Rio Blanco Abajo	10.9004	-85.3725	500
DHJPAR0027698	ASHYD724-08	08-SRNP-3996		622	10	2	JQ848492	0	No	Pseudapanteles	Pseudapanteles christianafigueresae	Daniel H. Janzen	djanzen@sas.upenn.edu	malaise-trapped	08-SRNP-3996 | malaise-trapped	D.H.Janzen&W.Hallwachs		Costa Rica	Alajuela	Area de Conservacion Guanacaste	Sector San Cristobal	Bosque Trampa Malaise	10.8628	-85.3846	815
DHJPAR0031193	ASHYG454-10	08-SRNP-38103	BOLD:AAK9737	658	0	2	HQ549957	0	Yes	Pseudapanteles	Pseudapanteles analorenaguevarae	Daniel H. Janzen	djanzen@sas.upenn.edu	malaise-trapped	08-SRNP-38103 | malaise-trapped	D.H.Janzen&W.Hallwachs		Costa Rica	Guanacaste	Area de Conservacion Guanacaste	Sector Cacao	Sendero Circular	10.9271	-85.4668	1185
DHJPAR0031329	ASHYG590-10	08-SRNP-38239	BOLD:AAK9737	658	0	2	HQ550081	0	Yes	Pseudapanteles	Pseudapanteles analorenaguevarae	Daniel H. Janzen	djanzen@sas.upenn.edu	malaise-trapped	08-SRNP-38239 | malaise-trapped	D.H.Janzen&W.Hallwachs		Costa Rica	Guanacaste	Area de Conservacion Guanacaste	Sector Cacao	Sendero Arenales	10.9247	-85.4674	1080
DHJPAR0031341	ASHYG602-10	08-SRNP-38251	BOLD:AAE0922	658	0	2	HQ550092	0	Yes	Pseudapanteles	Pseudapanteles alvaroumanai			malaise-trapped	08-SRNP-38251 | malaise-trapped	D.H.Janzen&W.Hallwachs		Costa Rica	Guanacaste	Area de Conservacion Guanacaste	Sector Cacao	Sendero Arenales	10.9247	-85.4674	1080
DHJPAR0031367	ASHYG628-10	08-SRNP-38277	BOLD:AAK9737	658	0	2	HQ550111	0	Yes	Pseudapanteles	Pseudapanteles analorenaguevarae	Daniel H. Janzen	djanzen@sas.upenn.edu	malaise-trapped	08-SRNP-38277 | malaise-trapped	D.H.Janzen&W.Hallwachs		Costa Rica	Guanacaste	Area de Conservacion Guanacaste	Sector Cacao	Cerro Pedregal	10.9277	-85.4745	1080
DHJPAR0031559	ASHYG820-10	08-SRNP-76000	BOLD:AAB2826	658	0	2	HQ550266	0	Yes	Pseudapanteles	Pseudapanteles rosemarykarpinskiae	Daniel H. Janzen	djanzen@sas.upenn.edu	malaise-trapped	08-SRNP-76000 | malaise-trapped	D.H.Janzen&W.Hallwachs		Costa Rica	Guanacaste	Area de Conservacion Guanacaste	Sector Santa Rosa	Area Administrativa	10.8376	-85.6187	295
DHJPAR0050027	ACGAZ1341-12	12-SRNP-71702	BOLD:ACC0954	658	0	2	KJ840802	0	Yes	Pseudapanteles	Pseudapanteles Janzen02	Daniel H. Janzen	djanzen@sas.upenn.edu	same as 12-SRNP-71591	Crambidae	Ricardo Calero	25-Jul-2012	Costa Rica	Guanacaste	Area de Conservacion Guanacaste	Sector Pitilla	Medrano
DHJPAR0051069	ACGBA3661-13	12-SRNP-87056	BOLD:ACJ2844	658	0	2	KJ840797	0	Yes	Pseudapanteles	Pseudapanteles Janzen03			same as 12-SRNP-40026	Crambidae	Anabelle Cordoba	29-Dec-2012	Costa Rica	Alajuela	Area de Conservacion Guanacaste	Sector Rincon Rain Forest	Sendero Venado	10.897	-85.27	420
DHJPAR0012718	ASBD225-07	03-SRNP-38735		255	5	1	KJ840805	0	No	Pseudapanteles	Pseudapanteles Whitfield13	Daniel H. Janzen	djanzen@sas.upenn.edu	malaise-trapped	03-SRNP-38735 | malaise-trapped	J.S.Noyes		Costa Rica	Alajuela	Area de Conservacion Guanacaste	Sector Rincon Rainforest	Estacion Caribe	10.9019	-85.2749	415
DHJPAR0024988	ASHYA327-08	07-SRNP-66450	BOLD:AAA2445	657	0	2	JQ852390	0	Yes	Pseudapanteles	Pseudapanteles margaritapenonae	Daniel H. Janzen	djanzen@sas.upenn.edu	malaise-trapped	07-SRNP-66450 | malaise-trapped	D.H.Janzen&W.Hallwachs		Costa Rica	Alajuela	Area de Conservacion Guanacaste	Sector San Cristobal	Rio Blanco Abajo	10.9004	-85.3725	500
DHJPAR0025118	ASHYA457-08	07-SRNP-66580	BOLD:AAA2445	655	2	2	JQ852424	0	Yes	Pseudapanteles	Pseudapanteles margaritapenonae	Daniel H. Janzen	djanzen@sas.upenn.edu	malaise-trapped	07-SRNP-66580 | malaise-trapped	D.H.Janzen&W.Hallwachs		Costa Rica	Alajuela	Area de Conservacion Guanacaste	Sector San Cristobal	Rio Blanco Abajo	10.9004	-85.3725	500
DHJPAR0025966	ASHYB305-08	07-SRNP-67428		605	9	2	JQ848791	0	No	Pseudapanteles	Pseudapanteles christianafigueresae	Daniel H. Janzen	djanzen@sas.upenn.edu	malaise-trapped	07-SRNP-67428 | malaise-trapped	D.H.Janzen&W.Hallwachs		Costa Rica	Alajuela	Area de Conservacion Guanacaste	Sector San Cristobal	Bosque Trampa Malaise	10.8628	-85.3846	815
DHJPAR0026033	ASHYB466-08	07-SRNP-67495	BOLD:AAA2445	655	2	2	JQ853711	0	Yes	Pseudapanteles	Pseudapanteles margaritapenonae			malaise-trapped	07-SRNP-67495 | malaise-trapped	D.H.Janzen&W.Hallwachs		Costa Rica	Alajuela	Area de Conservacion Guanacaste	Sector San Cristobal	Bosque Trampa Malaise	10.8628	-85.3846	815
DHJPAR0026226	ASHYC249-08	08-SRNP-41783	BOLD:AAE0922	629	0	1	JQ850960	0	No	Pseudapanteles	Pseudapanteles alvaroumanai	Daniel H. Janzen	djanzen@sas.upenn.edu	malaise-trapped	08-SRNP-41783 | malaise-trapped	D.H.Janzen&W.Hallwachs		Costa Rica	Alajuela	Area de Conservacion Guanacaste	Sector Rincon Rainforest	Vado Rio Francia	10.9009	-85.2891	400
DHJPAR0026326	ASHYC349-08	07-SRNP-67631	BOLD:AAA2445	655	2	2	JQ853417	0	Yes	Pseudapanteles	Pseudapanteles margaritapenonae	Daniel H. Janzen	djanzen@sas.upenn.edu	malaise-trapped	07-SRNP-67631 | malaise-trapped	D.H.Janzen&W.Hallwachs		Costa Rica	Alajuela	Area de Conservacion Guanacaste	Sector San Cristobal	Rio Blanco Abajo	10.9004	-85.3725	500
DHJPAR0026485	ASHYC508-08	08-SRNP-2904	BOLD:AAA2445	657	0	2	JQ848451	0	Yes	Pseudapanteles	Pseudapanteles margaritapenonae	Daniel H. Janzen	djanzen@sas.upenn.edu	malaise-trapped	08-SRNP-2904 | malaise-trapped	D.H.Janzen&W.Hallwachs		Costa Rica	Alajuela	Area de Conservacion Guanacaste	Sector San Cristobal	Rio Blanco Abajo	10.9004	-85.3725	500
DHJPAR0026726	ASHYC749-08	08-SRNP-3145	BOLD:AAA2445	656	1	0	JQ847170	0	No	Pseudapanteles	Pseudapanteles margaritapenonae	Daniel H. Janzen	djanzen@sas.upenn.edu	malaise-trapped	08-SRNP-3145 | malaise-trapped	D.H.Janzen&W.Hallwachs		Costa Rica	Alajuela	Area de Conservacion Guanacaste	Sector San Cristobal	Rio Blanco Abajo	10.9004	-85.3725	500
DHJPAR0026998	ASHYD024-08	08-SRNP-3417	BOLD:AAA2445	657	0	1	JQ846554	0	No	Pseudapanteles	Pseudapanteles margaritapenonae	Daniel H. Janzen	djanzen@sas.upenn.edu	malaise-trapped	08-SRNP-3417 | malaise-trapped	D.H.Janzen&W.Hallwachs		Costa Rica	Alajuela	Area de Conservacion Guanacaste	Sector San Cristobal	Rio Blanco Abajo	10.9004	-85.3725	500
DHJPAR0027180	ASHYD206-08	08-SRNP-3599	BOLD:AAA2445	596	1	2	JQ847977	0	Yes	Pseudapanteles	Pseudapanteles margaritapenonae	Daniel H. Janzen	djanzen@sas.upenn.edu	malaise-trapped	08-SRNP-3599 | malaise-trapped	D.H.Janzen&W.Hallwachs		Costa Rica	Alajuela	Area de Conservacion Guanacaste	Sector San Cristobal	Rio Blanco Abajo	10.9004	-85.3725	500
DHJPAR0027209	ASHYD235-08	08-SRNP-3628	BOLD:AAA2445	578	1	2	JQ854543	0	Yes	Pseudapanteles	Pseudapanteles margaritapenonae	Daniel H. Janzen	djanzen@sas.upenn.edu	malaise-trapped	08-SRNP-3628 | malaise-trapped	D.H.Janzen&W.Hallwachs		Costa Rica	Alajuela	Area de Conservacion Guanacaste	Sector San Cristobal	Rio Blanco Abajo	10.9004	-85.3725	500
DHJPAR0027229	ASHYD255-08	08-SRNP-3648	BOLD:AAA2445	621	1	1	JQ852646	0	No	Pseudapanteles	Pseudapanteles margaritapenonae	Daniel H. Janzen	djanzen@sas.upenn.edu	malaise-trapped	08-SRNP-3648 | malaise-trapped	D.H.Janzen&W.Hallwachs		Costa Rica	Alajuela	Area de Conservacion Guanacaste	Sector San Cristobal	Rio Blanco Abajo	10.9004	-85.3725	500
DHJPAR0027330	ASHYD356-08	08-SRNP-3749	BOLD:AAA2445	631	0	2	JQ850361	0	Yes	Pseudapanteles	Pseudapanteles margaritapenonae	Daniel H. Janzen	djanzen@sas.upenn.edu	malaise-trapped	08-SRNP-3749 | malaise-trapped	D.H.Janzen&W.Hallwachs		Costa Rica	Alajuela	Area de Conservacion Guanacaste	Sector San Cristobal	Rio Blanco Abajo	10.9004	-85.3725	500
DHJPAR0027393	ASHYD419-08	08-SRNP-3812	BOLD:AAA2445	656	1	2	JQ851233	0	Yes	Pseudapanteles	Pseudapanteles margaritapenonae	Daniel H. Janzen	djanzen@sas.upenn.edu	malaise-trapped	08-SRNP-3812 | malaise-trapped	D.H.Janzen&W.Hallwachs		Costa Rica	Alajuela	Area de Conservacion Guanacaste	Sector San Cristobal	Rio Blanco Abajo	10.9004	-85.3725	500
DHJPAR0027419	ASHYD445-08	08-SRNP-3838	BOLD:AAA2445	652	1	2	JQ853262	0	Yes	Pseudapanteles	Pseudapanteles margaritapenonae	Daniel H. Janzen	djanzen@sas.upenn.edu	malaise-trapped	08-SRNP-3838 | malaise-trapped	D.H.Janzen&W.Hallwachs		Costa Rica	Alajuela	Area de Conservacion Guanacaste	Sector San Cristobal	Rio Blanco Abajo	10.9004	-85.3725	500
DHJPAR0027440	ASHYD466-08	08-SRNP-3859	BOLD:AAA2445	657	0	2	JQ854478	0	Yes	Pseudapanteles	Pseudapanteles margaritapenonae			malaise-trapped	08-SRNP-3859 | malaise-trapped	D.H.Janzen&W.Hallwachs		Costa Rica	Alajuela	Area de Conservacion Guanacaste	Sector San Cristobal	Rio Blanco Abajo	10.9004	-85.3725	500
DHJPAR0027700	ASHYD726-08	08-SRNP-3998	BOLD:AAA6668	627	0	2	JQ852176	0	Yes	Pseudapanteles	Pseudapanteles christianafigueresae	Daniel H. Janzen	djanzen@sas.upenn.edu	malaise-trapped	08-SRNP-3998 | malaise-trapped	D.H.Janzen&W.Hallwachs		Costa Rica	Alajuela	Area de Conservacion Guanacaste	Sector San Cristobal	Bosque Trampa Malaise	10.8628	-85.3846	815
DHJPAR0040493	ASHYE2629-11	10-SRNP-2919	BOLD:AAT8844	658	0	2	JQ574919	0	Yes	Pseudapanteles	Pseudapanteles Whitfield26			same as 10-2586	10-SRNP-2919 | Elachistidae	Elda Araya	26-Jun-2010	Costa Rica	Alajuela	Area de Conservacion Guanacaste	Sector San Cristobal	Camino Albergue Oscar	10.877	-85.324	560
DHJPAR0033842	ASHYG112-10	08-SRNP-37761	BOLD:AAA6667	658	0	2	HQ549676	0	Yes	Pseudapanteles	Pseudapanteles raulsolorzanoi	Daniel H. Janzen	djanzen@sas.upenn.edu	malaise-trapped	08-SRNP-37761 | malaise-trapped	D.H.Janzen&W.Hallwachs		Costa Rica	Guanacaste	Area de Conservacion Guanacaste	Sector Cacao	Cerro Pedregal	10.9277	-85.4745	1080
DHJPAR0031192	ASHYG453-10	08-SRNP-38102	BOLD:AAK9737	658	0	2	HQ549956	0	Yes	Pseudapanteles	Pseudapanteles analorenaguevarae	Daniel H. Janzen	djanzen@sas.upenn.edu	malaise-trapped	08-SRNP-38102 | malaise-trapped	D.H.Janzen&W.Hallwachs		Costa Rica	Guanacaste	Area de Conservacion Guanacaste	Sector Cacao	Sendero Circular	10.9271	-85.4668	1185
DHJPAR0031342	ASHYG603-10	08-SRNP-38252		271	0	3	KJ840817	0	No	Pseudapanteles	Pseudapanteles Janzen02	Daniel H. Janzen	djanzen@sas.upenn.edu	malaise-trapped	08-SRNP-38252 | malaise-trapped	D.H.Janzen&W.Hallwachs		Costa Rica	Guanacaste	Area de Conservacion Guanacaste	Sector Cacao	Sendero Arenales	10.9247	-85.4674	1080
DHJPAR0031398	ASHYG659-10	08-SRNP-38308	BOLD:AAK9737	658	0	2	HQ550141	0	Yes	Pseudapanteles	Pseudapanteles analorenaguevarae	Daniel H. Janzen	djanzen@sas.upenn.edu	malaise-trapped	08-SRNP-38308 | malaise-trapped	D.H.Janzen&W.Hallwachs		Costa Rica	Guanacaste	Area de Conservacion Guanacaste	Sector Cacao	Cerro Pedregal	10.9277	-85.4745	1080
DHJPAR0012577	ASBD084-07	98-SRNP-16019	BOLD:AAF6107	657	0	2	JQ852485	0	Yes	Pseudapanteles	Pseudapanteles alfiopivai	Daniel H. Janzen	djanzen@sas.upenn.edu	malaise-trapped	98-SRNP-16019 | malaise-trapped	D.H.Janzen&W.Hallwachs		Costa Rica	Guanacaste	Area de Conservacion Guanacaste	Sector El Hacha	Sendero Bejuquilla	11.03	-85.527	280
DHJPAR0013243	ASBRD217-07	07-SRNP-15050	BOLD:AAB2826	656	1	2	JQ850778	0	Yes	Pseudapanteles	Pseudapanteles rosemarykarpinskiae	Daniel H. Janzen	djanzen@sas.upenn.edu	yellow pan-trapped	07-SRNP-15050 | yellow pan-trapped	A. R. Deans		Costa Rica	Guanacaste	Area de Conservacion Guanacaste	Sector Santa Rosa	Bosque San Emilio	10.8439	-85.6138	300
DHJPAR0024752	ASHYA091-08	08-SRNP-12186	BOLD:AAB2826	653	0	2	JQ851437	0	Yes	Pseudapanteles	Pseudapanteles rosemarykarpinskiae	Daniel H. Janzen	djanzen@sas.upenn.edu	yellow pan-trapped	08-SRNP-12186 | yellow pan-trapped	Andy Deans		Costa Rica	Guanacaste	Area de Conservacion Guanacaste	Sector Santa Rosa	Area Administrativa	10.8376	-85.6187	295
DHJPAR0025055	ASHYA394-08	07-SRNP-66517	BOLD:AAA2445	612	5	2	JQ850337	0	Yes	Pseudapanteles	Pseudapanteles margaritapenonae	Daniel H. Janzen	djanzen@sas.upenn.edu	malaise-trapped	07-SRNP-66517 | malaise-trapped	D.H.Janzen&W.Hallwachs		Costa Rica	Alajuela	Area de Conservacion Guanacaste	Sector San Cristobal	Rio Blanco Abajo	10.9004	-85.3725	500
DHJPAR0025380	ASHYA719-08	07-SRNP-66842	BOLD:AAF6051	657	0	2	JQ849472	0	Yes	Pseudapanteles	Pseudapanteles Whitfield12			malaise-trapped	07-SRNP-66842 | malaise-trapped	D.H.Janzen&W.Hallwachs		Costa Rica	Alajuela	Area de Conservacion Guanacaste	Sector Rincon Rainforest	Vado Rio Francia	10.9009	-85.2891	400
DHJPAR0039459	ASHYB1747-10	10-SRNP-2415	BOLD:AAM1093	622	0	3	JQ574534	0	Yes	Pseudapanteles	Pseudapanteles oscarariasi	Daniel H. Janzen	djanzen@sas.upenn.edu	Antaeotricha Janzen888	10-SRNP-2415 | Elachistidae	Elda Araya	28-May-2010	Costa Rica	Alajuela	Area de Conservacion Guanacaste	Sector San Cristobal	Sendero Albergue Crater	10.849	-85.328	980
DHJPAR0025854	ASHYB193-08	07-SRNP-67316	BOLD:AAX8359	654	3	2	JQ848647	0	Yes	Pseudapanteles	Pseudapanteles jorgerodriguezi			malaise-trapped	07-SRNP-67316 | malaise-trapped	D.H.Janzen&W.Hallwachs		Costa Rica	Alajuela	Area de Conservacion Guanacaste	Sector San Cristobal	Estacion San Gerardo	10.8801	-85.3889	575
DHJPAR0039680	ASHYB1968-10	09-SRNP-2752	BOLD:AAH8195	658	0	2	HQ926353	0	Yes	Pseudapanteles	Pseudapanteles mariocarvajali			Stenoma Janzen373	09-SRNP-2752 | Elachistidae	Elda Araya	03-Jul-2009	Costa Rica	Alajuela	Area de Conservacion Guanacaste	Sector San Cristobal	Quebrada Garcia	10.861	-85.426	495
DHJPAR0026065	ASHYB498-08	07-SRNP-67527	BOLD:AAA6668	657	0	2	JQ850243	0	Yes	Pseudapanteles	Pseudapanteles christianafigueresae	Daniel H. Janzen	djanzen@sas.upenn.edu	malaise-trapped	07-SRNP-67527 | malaise-trapped	D.H.Janzen&W.Hallwachs		Costa Rica	Alajuela	Area de Conservacion Guanacaste	Sector San Cristobal	Bosque Trampa Malaise	10.8628	-85.3846	815
DHJPAR0026081	ASHYB514-08	07-SRNP-67543		610	17	2	JQ854638	0	No	Pseudapanteles	Pseudapanteles christianafigueresae	Daniel H. Janzen	djanzen@sas.upenn.edu	malaise-trapped	07-SRNP-67543 | malaise-trapped	D.H.Janzen&W.Hallwachs		Costa Rica	Alajuela	Area de Conservacion Guanacaste	Sector San Cristobal	Bosque Trampa Malaise	10.8628	-85.3846	815
DHJPAR0026084	ASHYB517-08	07-SRNP-67546	BOLD:AAA6668	624	0	2	JQ849792	0	Yes	Pseudapanteles	Pseudapanteles christianafigueresae	Daniel H. Janzen	djanzen@sas.upenn.edu	malaise-trapped	07-SRNP-67546 | malaise-trapped	D.H.Janzen&W.Hallwachs		Costa Rica	Alajuela	Area de Conservacion Guanacaste	Sector San Cristobal	Bosque Trampa Malaise	10.8628	-85.3846	815
DHJPAR0026534	ASHYC557-08	08-SRNP-2953	BOLD:AAA2445	657	0	2	JQ849707	0	Yes	Pseudapanteles	Pseudapanteles margaritapenonae			malaise-trapped	08-SRNP-2953 | malaise-trapped	D.H.Janzen&W.Hallwachs		Costa Rica	Alajuela	Area de Conservacion Guanacaste	Sector San Cristobal	Rio Blanco Abajo	10.9004	-85.3725	500
DHJPAR0026703	ASHYC726-08	08-SRNP-3122	BOLD:AAA2445	628	0	0	JQ852112	0	No	Pseudapanteles	Pseudapanteles margaritapenonae	Daniel H. Janzen	djanzen@sas.upenn.edu	malaise-trapped	08-SRNP-3122 | malaise-trapped	D.H.Janzen&W.Hallwachs		Costa Rica	Alajuela	Area de Conservacion Guanacaste	Sector San Cristobal	Rio Blanco Abajo	10.9004	-85.3725	500
DHJPAR0026835	ASHYC858-08	08-SRNP-3254	BOLD:AAA2445	628	0	2	JQ848889	0	Yes	Pseudapanteles	Pseudapanteles margaritapenonae	Daniel H. Janzen	djanzen@sas.upenn.edu	malaise-trapped	08-SRNP-3254 | malaise-trapped	D.H.Janzen&W.Hallwachs		Costa Rica	Alajuela	Area de Conservacion Guanacaste	Sector San Cristobal	Rio Blanco Abajo	10.9004	-85.3725	500
DHJPAR0031746	ASHYD1670-10	08-SRNP-76187	BOLD:AAB2826	658	0	2	HQ548883	0	Yes	Pseudapanteles	Pseudapanteles rosemarykarpinskiae	Daniel H. Janzen	djanzen@sas.upenn.edu	malaise-trapped	08-SRNP-76187 | malaise-trapped	D.H.Janzen&W.Hallwachs		Costa Rica	Guanacaste	Area de Conservacion Guanacaste	Sector Santa Rosa	Area Administrativa	10.8376	-85.6187	295
DHJPAR0031833	ASHYD1757-10	08-SRNP-76274	BOLD:AAB2826	658	0	2	HQ548961	0	Yes	Pseudapanteles	Pseudapanteles rosemarykarpinskiae	Daniel H. Janzen	djanzen@sas.upenn.edu	malaise-trapped	08-SRNP-76274 | malaise-trapped	D.H.Janzen&W.Hallwachs		Costa Rica	Guanacaste	Area de Conservacion Guanacaste	Sector Santa Rosa	Area Administrativa	10.8376	-85.6187	295
DHJPAR0027256	ASHYD282-08	08-SRNP-3675	BOLD:AAA2445	629	0	1	JQ848681	0	No	Pseudapanteles	Pseudapanteles margaritapenonae	Daniel H. Janzen	djanzen@sas.upenn.edu	malaise-trapped	08-SRNP-3675 | malaise-trapped	D.H.Janzen&W.Hallwachs		Costa Rica	Alajuela	Area de Conservacion Guanacaste	Sector San Cristobal	Rio Blanco Abajo	10.9004	-85.3725	500
DHJPAR0027446	ASHYD472-08	08-SRNP-3865	BOLD:AAA2445	657	0	2	JQ849224	0	Yes	Pseudapanteles	Pseudapanteles margaritapenonae	Daniel H. Janzen	djanzen@sas.upenn.edu	malaise-trapped	08-SRNP-3865 | malaise-trapped	D.H.Janzen&W.Hallwachs		Costa Rica	Alajuela	Area de Conservacion Guanacaste	Sector San Cristobal	Rio Blanco Abajo	10.9004	-85.3725	500
DHJPAR0027453	ASHYD479-08	08-SRNP-3872	BOLD:AAA2445	629	1	1	JQ848137	0	No	Pseudapanteles	Pseudapanteles margaritapenonae	Daniel H. Janzen	djanzen@sas.upenn.edu	malaise-trapped	08-SRNP-3872 | malaise-trapped	D.H.Janzen&W.Hallwachs		Costa Rica	Alajuela	Area de Conservacion Guanacaste	Sector San Cristobal	Rio Blanco Abajo	10.9004	-85.3725	500
DHJPAR0027460	ASHYD486-08	08-SRNP-3879	BOLD:AAA2445	657	0	2	JQ848736	0	Yes	Pseudapanteles	Pseudapanteles margaritapenonae	Daniel H. Janzen	djanzen@sas.upenn.edu	malaise-trapped	08-SRNP-3879 | malaise-trapped	D.H.Janzen&W.Hallwachs		Costa Rica	Alajuela	Area de Conservacion Guanacaste	Sector San Cristobal	Rio Blanco Abajo	10.9004	-85.3725	500
DHJPAR0027675	ASHYD701-08	08-SRNP-3973		613	9	2	JQ846695	0	No	Pseudapanteles	Pseudapanteles christianafigueresae	Daniel H. Janzen	djanzen@sas.upenn.edu	malaise-trapped	08-SRNP-3973 | malaise-trapped	D.H.Janzen&W.Hallwachs		Costa Rica	Alajuela	Area de Conservacion Guanacaste	Sector San Cristobal	Bosque Trampa Malaise	10.8628	-85.3846	815
DHJPAR0033732	ASHYG002-10	08-SRNP-37651	BOLD:AAE0922	658	0	2	HQ549581	0	Yes	Pseudapanteles	Pseudapanteles alvaroumanai	Daniel H. Janzen	djanzen@sas.upenn.edu	malaise-trapped	08-SRNP-37651 | malaise-trapped	D.H.Janzen&W.Hallwachs		Costa Rica	Guanacaste	Area de Conservacion Guanacaste	Sector Cacao	Cerro Pedregal	10.9277	-85.4745	1080
DHJPAR0033896	ASHYG166-10	08-SRNP-37815	BOLD:AAE0922	658	0	2	HQ549726	0	Yes	Pseudapanteles	Pseudapanteles alvaroumanai	Daniel H. Janzen	djanzen@sas.upenn.edu	malaise-trapped	08-SRNP-37815 | malaise-trapped	D.H.Janzen&W.Hallwachs		Costa Rica	Guanacaste	Area de Conservacion Guanacaste	Sector Cacao	Sendero Arenales	10.9247	-85.4674	1080
DHJPAR0031325	ASHYG586-10	08-SRNP-38235		286	3	3	KJ840800	0	No	Pseudapanteles	Pseudapanteles christianafigueresae	Daniel H. Janzen	djanzen@sas.upenn.edu	malaise-trapped	08-SRNP-38235 | malaise-trapped	D.H.Janzen&W.Hallwachs		Costa Rica	Guanacaste	Area de Conservacion Guanacaste	Sector Cacao	Sendero Arenales	10.9247	-85.4674	1080
DHJPAR0052954	ASHYM2308-13	13-SRNP-76587	BOLD:AAE8275	658	0	2	KJ840806	0	Yes	Pseudapanteles	Pseudapanteles ruficolis	Daniel H. Janzen	djanzen@sas.upenn.edu	Desmia ufeus	Crambidae	Cirilo Umana	24-Jun-2013	Costa Rica	Guanacaste	Area de Conservacion Guanacaste	Sector Rincon Rain Forest	Quebrada Bambu
DHJPAR0048241	ACGBA1814-12	11-SRNP-20785	BOLD:ABX4834	658	0	2	KJ840813	0	Yes	Pseudapanteles	Pseudapanteles teophilodelatorrei	Daniel H. Janzen	djanzen@sas.upenn.edu	see description	Elachistidae	Roster Moraga	15-May-2011	Costa Rica	Guanacaste	Area de Conservacion Guanacaste	Sector El Hacha	Quebrada La Leona
DHJPAR0049218	ACGBA2760-12	12-SRNP-75497	BOLD:AAE8275	652	0	2	KJ840810	0	Yes	Pseudapanteles	Pseudapanteles ruficolis	Daniel H. Janzen	djanzen@sas.upenn.edu	Desmia ufeus	Crambidae	Mercedes Moraga	29-Feb-2012	Costa Rica	Guanacaste	Area de Conservacion Guanacaste	Sector Rincon Rain Forest	Estacion Llanura
DHJPAR0013419	ASBRD305-07	00-SRNP-24014	BOLD:AAA6667	657	0	2	JQ850617	0	Yes	Pseudapanteles	Pseudapanteles raulsolorzanoi	Daniel H. Janzen	djanzen@sas.upenn.edu	malaise-trapped	00-SRNP-24014 | malaise-trapped	D.H.Janzen&W.Hallwachs		Costa Rica	Guanacaste	Area de Conservacion Guanacaste	Sector Santa Rosa	Bosque Humedo	10.8514	-85.608	290
DHJPAR0024750	ASHYA089-08	08-SRNP-12184	BOLD:AAB2826	656	0	2	JQ847273	0	Yes	Pseudapanteles	Pseudapanteles rosemarykarpinskiae	Daniel H. Janzen	djanzen@sas.upenn.edu	yellow pan-trapped	08-SRNP-12184 | yellow pan-trapped	Andy Deans		Costa Rica	Guanacaste	Area de Conservacion Guanacaste	Sector Santa Rosa	Area Administrativa	10.8376	-85.6187	295
DHJPAR0025342	ASHYA681-08	07-SRNP-66804	BOLD:AAA2445	654	3	2	JQ853092	0	Yes	Pseudapanteles	Pseudapanteles margaritapenonae	Daniel H. Janzen	djanzen@sas.upenn.edu	malaise-trapped	07-SRNP-66804 | malaise-trapped	D.H.Janzen&W.Hallwachs		Costa Rica	Alajuela	Area de Conservacion Guanacaste	Sector San Cristobal	Rio Blanco Abajo	10.9004	-85.3725	500
DHJPAR0025507	ASHYA846-08	07-SRNP-66969	BOLD:AAF6051	655	0	0	JQ850665	0	No	Pseudapanteles	Pseudapanteles Whitfield12	Daniel H. Janzen	djanzen@sas.upenn.edu	malaise-trapped	07-SRNP-66969 | malaise-trapped	D.H.Janzen&W.Hallwachs		Costa Rica	Alajuela	Area de Conservacion Guanacaste	Sector Rincon Rainforest	Vado Rio Francia	10.9009	-85.2891	400
DHJPAR0025902	ASHYB241-08	07-SRNP-67364		643	14	2	JQ847935	0	No	Pseudapanteles	Pseudapanteles christianafigueresae	Daniel H. Janzen	djanzen@sas.upenn.edu	malaise-trapped	07-SRNP-67364 | malaise-trapped	D.H.Janzen&W.Hallwachs		Costa Rica	Alajuela	Area de Conservacion Guanacaste	Sector San Cristobal	Bosque Trampa Malaise	10.8628	-85.3846	815
DHJPAR0025959	ASHYB298-08	07-SRNP-67421	BOLD:AAA2445	654	3	2	JQ855464	0	Yes	Pseudapanteles	Pseudapanteles margaritapenonae			malaise-trapped	07-SRNP-67421 | malaise-trapped	D.H.Janzen&W.Hallwachs		Costa Rica	Alajuela	Area de Conservacion Guanacaste	Sector San Cristobal	Bosque Trampa Malaise	10.8628	-85.3846	815
DHJPAR0026060	ASHYB493-08	07-SRNP-67522	BOLD:AAX8356	621	3	2	JQ850204	0	Yes	Pseudapanteles	Pseudapanteles laurachinchillae			malaise-trapped	07-SRNP-67522 | malaise-trapped	D.H.Janzen&W.Hallwachs		Costa Rica	Alajuela	Area de Conservacion Guanacaste	Sector San Cristobal	Bosque Trampa Malaise	10.8628	-85.3846	815
DHJPAR0026206	ASHYC229-08	08-SRNP-41763	BOLD:AAA2445	657	0	2	JQ850455	0	Yes	Pseudapanteles	Pseudapanteles margaritapenonae	Daniel H. Janzen	djanzen@sas.upenn.edu	malaise-trapped	08-SRNP-41763 | malaise-trapped	D.H.Janzen&W.Hallwachs		Costa Rica	Alajuela	Area de Conservacion Guanacaste	Sector Rincon Rainforest	Vado Rio Francia	10.9009	-85.2891	400
DHJPAR0026444	ASHYC467-08	08-SRNP-2863	BOLD:AAA2445	654	3	2	JQ847216	0	Yes	Pseudapanteles	Pseudapanteles margaritapenonae	Daniel H. Janzen	djanzen@sas.upenn.edu	malaise-trapped	08-SRNP-2863 | malaise-trapped	D.H.Janzen&W.Hallwachs		Costa Rica	Alajuela	Area de Conservacion Guanacaste	Sector San Cristobal	Rio Blanco Abajo	10.9004	-85.3725	500
DHJPAR0026798	ASHYC821-08	08-SRNP-3217	BOLD:AAA2445	603	0	2	JQ854229	0	Yes	Pseudapanteles	Pseudapanteles margaritapenonae	Daniel H. Janzen	djanzen@sas.upenn.edu	malaise-trapped	08-SRNP-3217 | malaise-trapped	D.H.Janzen&W.Hallwachs		Costa Rica	Alajuela	Area de Conservacion Guanacaste	Sector San Cristobal	Rio Blanco Abajo	10.9004	-85.3725	500
DHJPAR0027000	ASHYD026-08	08-SRNP-3419	BOLD:AAA2445	637	0	2	JQ854503	0	Yes	Pseudapanteles	Pseudapanteles margaritapenonae	Daniel H. Janzen	djanzen@sas.upenn.edu	malaise-trapped	08-SRNP-3419 | malaise-trapped	D.H.Janzen&W.Hallwachs		Costa Rica	Alajuela	Area de Conservacion Guanacaste	Sector San Cristobal	Rio Blanco Abajo	10.9004	-85.3725	500
DHJPAR0027088	ASHYD114-08	08-SRNP-3507	BOLD:AAA2445	595	2	2	JQ854579	0	Yes	Pseudapanteles	Pseudapanteles margaritapenonae	Daniel H. Janzen	djanzen@sas.upenn.edu	malaise-trapped	08-SRNP-3507 | malaise-trapped	D.H.Janzen&W.Hallwachs		Costa Rica	Alajuela	Area de Conservacion Guanacaste	Sector San Cristobal	Rio Blanco Abajo	10.9004	-85.3725	500
DHJPAR0027176	ASHYD202-08	08-SRNP-3595	BOLD:AAA2445	590	1	2	JQ847049	0	Yes	Pseudapanteles	Pseudapanteles margaritapenonae	Daniel H. Janzen	djanzen@sas.upenn.edu	malaise-trapped	08-SRNP-3595 | malaise-trapped	D.H.Janzen&W.Hallwachs		Costa Rica	Alajuela	Area de Conservacion Guanacaste	Sector San Cristobal	Rio Blanco Abajo	10.9004	-85.3725	500
DHJPAR0027331	ASHYD357-08	08-SRNP-3750	BOLD:AAA2445	637	0	2	JQ855419	0	Yes	Pseudapanteles	Pseudapanteles margaritapenonae	Daniel H. Janzen	djanzen@sas.upenn.edu	malaise-trapped	08-SRNP-3750 | malaise-trapped	D.H.Janzen&W.Hallwachs		Costa Rica	Alajuela	Area de Conservacion Guanacaste	Sector San Cristobal	Rio Blanco Abajo	10.9004	-85.3725	500
DHJPAR0027450	ASHYD476-08	08-SRNP-3869	BOLD:AAA2445	650	0	2	JQ848460	0	Yes	Pseudapanteles	Pseudapanteles margaritapenonae	Daniel H. Janzen	djanzen@sas.upenn.edu	malaise-trapped	08-SRNP-3869 | malaise-trapped	D.H.Janzen&W.Hallwachs		Costa Rica	Alajuela	Area de Conservacion Guanacaste	Sector San Cristobal	Rio Blanco Abajo	10.9004	-85.3725	500
DHJPAR0027673	ASHYD699-08	08-SRNP-3971		609	13	2	JQ850868	0	No	Pseudapanteles	Pseudapanteles christianafigueresae	Daniel H. Janzen	djanzen@sas.upenn.edu	malaise-trapped	08-SRNP-3971 | malaise-trapped	D.H.Janzen&W.Hallwachs		Costa Rica	Alajuela	Area de Conservacion Guanacaste	Sector San Cristobal	Bosque Trampa Malaise	10.8628	-85.3846	815
DHJPAR0027693	ASHYD719-08	08-SRNP-3991		599	21	1	JQ853462	0	No	Pseudapanteles	Pseudapanteles christianafigueresae	Daniel H. Janzen	djanzen@sas.upenn.edu	malaise-trapped	08-SRNP-3991 | malaise-trapped	D.H.Janzen&W.Hallwachs		Costa Rica	Alajuela	Area de Conservacion Guanacaste	Sector San Cristobal	Bosque Trampa Malaise	10.8628	-85.3846	815
DHJPAR0041506	ASHYF1412-11	10-SRNP-7287	BOLD:AAH8195	658	0	2	JQ575324	0	Yes	Pseudapanteles	Pseudapanteles mariocarvajali	Daniel H. Janzen	djanzen@sas.upenn.edu	Stenoma Janzen373	10-SRNP-7287 | Elachistidae	Carolina Cano	31-Dec-2010	Costa Rica	Alajuela	Area de Conservacion Guanacaste	Sector San Cristobal	Tajo Angeles	10.865	-85.415	540
DHJPAR0033902	ASHYG172-10	08-SRNP-37821	BOLD:AAE0922	658	0	2	HQ549732	0	Yes	Pseudapanteles	Pseudapanteles alvaroumanai	Daniel H. Janzen	djanzen@sas.upenn.edu	malaise-trapped	08-SRNP-37821 | malaise-trapped	D.H.Janzen&W.Hallwachs		Costa Rica	Guanacaste	Area de Conservacion Guanacaste	Sector Cacao	Sendero Arenales	10.9247	-85.4674	1080
DHJPAR0031639	ASHYG900-10	08-SRNP-76080		293	0	3	KJ840821	0	No	Pseudapanteles	Pseudapanteles renecastroi	Daniel H. Janzen	djanzen@sas.upenn.edu	malaise-trapped	08-SRNP-76080 | malaise-trapped	D.H.Janzen&W.Hallwachs		Costa Rica	Guanacaste	Area de Conservacion Guanacaste	Sector Santa Rosa	Area Administrativa	10.8376	-85.6187	295
DHJPAR0031644	ASHYG905-10	08-SRNP-76085	BOLD:AAB2826	658	0	2	HQ550337	0	Yes	Pseudapanteles	Pseudapanteles rosemarykarpinskiae	Daniel H. Janzen	djanzen@sas.upenn.edu	malaise-trapped	08-SRNP-76085 | malaise-trapped	D.H.Janzen&W.Hallwachs		Costa Rica	Guanacaste	Area de Conservacion Guanacaste	Sector Santa Rosa	Area Administrativa	10.8376	-85.6187	295
DHJPAR0031648	ASHYG909-10	08-SRNP-76089	BOLD:AAB2826	658	0	2	HQ550341	0	Yes	Pseudapanteles	Pseudapanteles rosemarykarpinskiae	Daniel H. Janzen	djanzen@sas.upenn.edu	malaise-trapped	08-SRNP-76089 | malaise-trapped	D.H.Janzen&W.Hallwachs		Costa Rica	Guanacaste	Area de Conservacion Guanacaste	Sector Santa Rosa	Area Administrativa	10.8376	-85.6187	295
DHJPAR0052339	ASHYH1451-13	DHJPAR0052339	BOLD:AAH8195	658	0	2	KJ840815	0	Yes	Pseudapanteles	Pseudapanteles mariocarvajali	Daniel H. Janzen	djanzen@sas.upenn.edu					Costa Rica
DHJPAR0013648	ASBD513-07	99-SRNP-19261	BOLD:AAE0922	606	0	2	JQ846685	0	Yes	Pseudapanteles	Pseudapanteles alvaroumanai	Daniel H. Janzen	djanzen@sas.upenn.edu	malaise-trapped	99-SRNP-19261 | malaise-trapped	D.H.Janzen&W.Hallwachs		Costa Rica	Guanacaste	Area de Conservacion Guanacaste	Sector El Hacha	Sendero Bejuquilla	11.03	-85.527	280
DHJPAR0013148	ASBRD144-07	00-SRNP-23877		486	51	2	JQ850015	0	No	Pseudapanteles	Pseudapanteles rosemarykarpinskiae	Daniel H. Janzen	djanzen@sas.upenn.edu	malaise-trapped	00-SRNP-23877 | malaise-trapped	D.H.Janzen&W.Hallwachs		Costa Rica	Guanacaste	Area de Conservacion Guanacaste	Sector Santa Rosa	Bosque San Emilio	10.8439	-85.6138	300
DHJPAR0013239	ASBRD256-07	99-SRNP-19108	BOLD:AAA6667	657	0	2	JQ850199	0	Yes	Pseudapanteles	Pseudapanteles raulsolorzanoi	Daniel H. Janzen	djanzen@sas.upenn.edu	malaise-trapped	99-SRNP-19108 | malaise-trapped	D.H.Janzen&W.Hallwachs		Costa Rica	Guanacaste	Area de Conservacion Guanacaste	Sector Santa Rosa	Bosque Humedo	10.8514	-85.608	290
DHJPAR0024755	ASHYA094-08	08-SRNP-12189	BOLD:AAB2826	655	0	2	JQ854780	0	Yes	Pseudapanteles	Pseudapanteles rosemarykarpinskiae	Daniel H. Janzen	djanzen@sas.upenn.edu	yellow pan-trapped	08-SRNP-12189 | yellow pan-trapped	Andy Deans		Costa Rica	Guanacaste	Area de Conservacion Guanacaste	Sector Santa Rosa	Area Administrativa	10.8376	-85.6187	295
DHJPAR0024842	ASHYA181-08	07-SRNP-66304	BOLD:AAA2445	657	0	2	JQ848313	0	Yes	Pseudapanteles	Pseudapanteles margaritapenonae	Daniel H. Janzen	djanzen@sas.upenn.edu	malaise-trapped	07-SRNP-66304 | malaise-trapped	D.H.Janzen&W.Hallwachs		Costa Rica	Alajuela	Area de Conservacion Guanacaste	Sector San Cristobal	Rio Blanco Abajo	10.9004	-85.3725	500
DHJPAR0024859	ASHYA198-08	07-SRNP-66321	BOLD:AAA2445	657	0	2	JQ852213	0	Yes	Pseudapanteles	Pseudapanteles margaritapenonae	Daniel H. Janzen	djanzen@sas.upenn.edu	malaise-trapped	07-SRNP-66321 | malaise-trapped	D.H.Janzen&W.Hallwachs		Costa Rica	Alajuela	Area de Conservacion Guanacaste	Sector San Cristobal	Rio Blanco Abajo	10.9004	-85.3725	500
DHJPAR0024910	ASHYA249-08	07-SRNP-66372	BOLD:AAA2445	657	0	2	JQ848545	0	Yes	Pseudapanteles	Pseudapanteles margaritapenonae	Daniel H. Janzen	djanzen@sas.upenn.edu	malaise-trapped	07-SRNP-66372 | malaise-trapped	D.H.Janzen&W.Hallwachs		Costa Rica	Alajuela	Area de Conservacion Guanacaste	Sector San Cristobal	Rio Blanco Abajo	10.9004	-85.3725	500
DHJPAR0025083	ASHYA422-08	07-SRNP-66545	BOLD:AAA2445	657	0	2	JQ852345	0	Yes	Pseudapanteles	Pseudapanteles margaritapenonae	Daniel H. Janzen	djanzen@sas.upenn.edu	malaise-trapped	07-SRNP-66545 | malaise-trapped	D.H.Janzen&W.Hallwachs		Costa Rica	Alajuela	Area de Conservacion Guanacaste	Sector San Cristobal	Rio Blanco Abajo	10.9004	-85.3725	500
DHJPAR0025406	ASHYA745-08	07-SRNP-66868	BOLD:AAA2445	656	1	2	JQ846756	0	Yes	Pseudapanteles	Pseudapanteles margaritapenonae	Daniel H. Janzen	djanzen@sas.upenn.edu	malaise-trapped	07-SRNP-66868 | malaise-trapped	D.H.Janzen&W.Hallwachs		Costa Rica	Alajuela	Area de Conservacion Guanacaste	Sector Rincon Rainforest	Vado Rio Francia	10.9009	-85.2891	400
DHJPAR0025819	ASHYB158-08	07-SRNP-67281		309	0	1	KJ840824	0	No	Pseudapanteles	Pseudapanteles rodrigogamezi	Daniel H. Janzen	djanzen@sas.upenn.edu	malaise-trapped	07-SRNP-67281 | malaise-trapped	D.H.Janzen&W.Hallwachs		Costa Rica	Alajuela	Area de Conservacion Guanacaste	Sector Rincon Rainforest	Estacion Caribe	10.9019	-85.2749	415
DHJPAR0026026	ASHYB459-08	07-SRNP-67488	BOLD:AAA6668	657	0	2	JQ848826	0	Yes	Pseudapanteles	Pseudapanteles christianafigueresae			malaise-trapped	07-SRNP-67488 | malaise-trapped	D.H.Janzen&W.Hallwachs		Costa Rica	Alajuela	Area de Conservacion Guanacaste	Sector San Cristobal	Bosque Trampa Malaise	10.8628	-85.3846	815
DHJPAR0026205	ASHYC228-08	08-SRNP-41762	BOLD:AAE0922	637	0	2	JQ847496	0	Yes	Pseudapanteles	Pseudapanteles alvaroumanai			malaise-trapped	08-SRNP-41762 | malaise-trapped	D.H.Janzen&W.Hallwachs		Costa Rica	Alajuela	Area de Conservacion Guanacaste	Sector Rincon Rainforest	Vado Rio Francia	10.9009	-85.2891	400
DHJPAR0026268	ASHYC291-08	08-SRNP-2824	BOLD:AAA2445	629	0	2	JQ854346	0	Yes	Pseudapanteles	Pseudapanteles margaritapenonae			malaise-trapped	08-SRNP-2824 | malaise-trapped	D.H.Janzen&W.Hallwachs		Costa Rica	Alajuela	Area de Conservacion Guanacaste	Sector San Cristobal	Estacion San Gerardo	10.8801	-85.3889	575
DHJPAR0026287	ASHYC310-08	07-SRNP-67592	BOLD:AAA2445	657	0	2	JQ850641	0	Yes	Pseudapanteles	Pseudapanteles margaritapenonae	Daniel H. Janzen	djanzen@sas.upenn.edu	malaise-trapped	07-SRNP-67592 | malaise-trapped	D.H.Janzen&W.Hallwachs		Costa Rica	Alajuela	Area de Conservacion Guanacaste	Sector San Cristobal	Rio Blanco Abajo	10.9004	-85.3725	500
DHJPAR0026488	ASHYC511-08	08-SRNP-2907	BOLD:AAA2445	657	0	2	JQ852377	0	Yes	Pseudapanteles	Pseudapanteles margaritapenonae	Daniel H. Janzen	djanzen@sas.upenn.edu	malaise-trapped	08-SRNP-2907 | malaise-trapped	D.H.Janzen&W.Hallwachs		Costa Rica	Alajuela	Area de Conservacion Guanacaste	Sector San Cristobal	Rio Blanco Abajo	10.9004	-85.3725	500
DHJPAR0026652	ASHYC675-08	08-SRNP-3071	BOLD:AAA6668	656	1	0	JQ850234	0	No	Pseudapanteles	Pseudapanteles christianafigueresae	Daniel H. Janzen	djanzen@sas.upenn.edu	malaise-trapped	08-SRNP-3071 | malaise-trapped	D.H.Janzen&W.Hallwachs		Costa Rica	Alajuela	Area de Conservacion Guanacaste	Sector San Cristobal	Rio Blanco Abajo	10.9004	-85.3725	500
DHJPAR0026671	ASHYC694-08	08-SRNP-3090	BOLD:AAA2445	549	0	0	JQ851760	0	No	Pseudapanteles	Pseudapanteles margaritapenonae	Daniel H. Janzen	djanzen@sas.upenn.edu	malaise-trapped	08-SRNP-3090 | malaise-trapped	D.H.Janzen&W.Hallwachs		Costa Rica	Alajuela	Area de Conservacion Guanacaste	Sector San Cristobal	Rio Blanco Abajo	10.9004	-85.3725	500
DHJPAR0026704	ASHYC727-08	08-SRNP-3123	BOLD:AAA2445	657	0	0	JQ848554	0	No	Pseudapanteles	Pseudapanteles margaritapenonae	Daniel H. Janzen	djanzen@sas.upenn.edu	malaise-trapped	08-SRNP-3123 | malaise-trapped	D.H.Janzen&W.Hallwachs		Costa Rica	Alajuela	Area de Conservacion Guanacaste	Sector San Cristobal	Rio Blanco Abajo	10.9004	-85.3725	500
DHJPAR0027168	ASHYD194-08	08-SRNP-3587	BOLD:AAA2445	580	0	2	JQ852150	0	Yes	Pseudapanteles	Pseudapanteles margaritapenonae	Daniel H. Janzen	djanzen@sas.upenn.edu	malaise-trapped	08-SRNP-3587 | malaise-trapped	D.H.Janzen&W.Hallwachs		Costa Rica	Alajuela	Area de Conservacion Guanacaste	Sector San Cristobal	Rio Blanco Abajo	10.9004	-85.3725	500
DHJPAR0038378	ASHYD1951-10	10-SRNP-251	BOLD:AAH8195	658	0	2	HQ549125	0	Yes	Pseudapanteles	Pseudapanteles mariocarvajali	Daniel H. Janzen	djanzen@sas.upenn.edu	Stenoma Janzen373	10-SRNP-251 | Elachistidae	Carolina Cano	01-Feb-2010	Costa Rica	Alajuela	Area de Conservacion Guanacaste	Sector San Cristobal	Tajo Angeles	10.865	-85.415	540
DHJPAR0027177	ASHYD203-08	08-SRNP-3596	BOLD:AAA2445	594	0	2	JQ847923	0	Yes	Pseudapanteles	Pseudapanteles margaritapenonae	Daniel H. Janzen	djanzen@sas.upenn.edu	malaise-trapped	08-SRNP-3596 | malaise-trapped	D.H.Janzen&W.Hallwachs		Costa Rica	Alajuela	Area de Conservacion Guanacaste	Sector San Cristobal	Rio Blanco Abajo	10.9004	-85.3725	500
DHJPAR0027182	ASHYD208-08	08-SRNP-3601	BOLD:AAA2445	592	0	2	JQ853248	0	Yes	Pseudapanteles	Pseudapanteles margaritapenonae	Daniel H. Janzen	djanzen@sas.upenn.edu	malaise-trapped	08-SRNP-3601 | malaise-trapped	D.H.Janzen&W.Hallwachs		Costa Rica	Alajuela	Area de Conservacion Guanacaste	Sector San Cristobal	Rio Blanco Abajo	10.9004	-85.3725	500
DHJPAR0027355	ASHYD381-08	08-SRNP-3774	BOLD:AAA2445	655	2	2	JQ854910	0	Yes	Pseudapanteles	Pseudapanteles margaritapenonae	Daniel H. Janzen	djanzen@sas.upenn.edu	malaise-trapped	08-SRNP-3774 | malaise-trapped	D.H.Janzen&W.Hallwachs		Costa Rica	Alajuela	Area de Conservacion Guanacaste	Sector San Cristobal	Rio Blanco Abajo	10.9004	-85.3725	500
DHJPAR0027407	ASHYD433-08	08-SRNP-3826	BOLD:AAA2445	656	1	2	JQ854437	0	Yes	Pseudapanteles	Pseudapanteles margaritapenonae	Daniel H. Janzen	djanzen@sas.upenn.edu	malaise-trapped	08-SRNP-3826 | malaise-trapped	D.H.Janzen&W.Hallwachs		Costa Rica	Alajuela	Area de Conservacion Guanacaste	Sector San Cristobal	Rio Blanco Abajo	10.9004	-85.3725	500
DHJPAR0031389	ASHYG650-10	08-SRNP-38299	BOLD:AAE0922	658	0	2	HQ550132	0	Yes	Pseudapanteles	Pseudapanteles alvaroumanai	Daniel H. Janzen	djanzen@sas.upenn.edu	malaise-trapped	08-SRNP-38299 | malaise-trapped	D.H.Janzen&W.Hallwachs		Costa Rica	Guanacaste	Area de Conservacion Guanacaste	Sector Cacao	Cerro Pedregal	10.9277	-85.4745	1080
DHJPAR0047133	ACGBA1276-12	11-SRNP-76718	BOLD:AAE8275	658	0	2	KJ840799	0	Yes	Pseudapanteles	Pseudapanteles ruficolis	Daniel H. Janzen	djanzen@sas.upenn.edu	Desmia see voucher	Crambidae	Mercedes Moraga	04-Dec-2011	Costa Rica	Guanacaste	Area de Conservacion Guanacaste	Sector Rincon Rain Forest	Estacion Llanura	10.933	-85.253	135
DHJPAR0049258	ACGBA2800-12	12-SRNP-1661	BOLD:ACB2343	658	0	2	KJ840803	0	Yes	Pseudapanteles	Pseudapanteles Janzen02	Daniel H. Janzen	djanzen@sas.upenn.edu	same as 09-SRNP-2456	Elachistidae	Elda Araya	09-May-2012	Costa Rica	Guanacaste	Area de Conservacion Guanacaste	Sector San Cristobal	Rio Blanco Abajo
DHJPAR0013248	ASBRD212-07	07-SRNP-15045	BOLD:AAB2826	657	0	2	JQ847729	0	Yes	Pseudapanteles	Pseudapanteles rosemarykarpinskiae	Daniel H. Janzen	djanzen@sas.upenn.edu	yellow pan-trapped	07-SRNP-15045 | yellow pan-trapped	A. R. Deans		Costa Rica	Guanacaste	Area de Conservacion Guanacaste	Sector Santa Rosa	Bosque San Emilio	10.8439	-85.6138	300
DHJPAR0013241	ASBRD219-07	07-SRNP-15052	BOLD:AAB2826	656	1	2	JQ852040	0	Yes	Pseudapanteles	Pseudapanteles rosemarykarpinskiae	Daniel H. Janzen	djanzen@sas.upenn.edu	yellow pan-trapped	07-SRNP-15052 | yellow pan-trapped	A. R. Deans		Costa Rica	Guanacaste	Area de Conservacion Guanacaste	Sector Santa Rosa	Bosque San Emilio	10.8439	-85.6138	300
DHJPAR0013240	ASBRD271-07	00-SRNP-23973	BOLD:AAA6667	657	0	2	JQ853971	0	Yes	Pseudapanteles	Pseudapanteles raulsolorzanoi	Daniel H. Janzen	djanzen@sas.upenn.edu	malaise-trapped	00-SRNP-23973 | malaise-trapped	D.H.Janzen&W.Hallwachs		Costa Rica	Guanacaste	Area de Conservacion Guanacaste	Sector Santa Rosa	Bosque Humedo	10.8514	-85.608	290
DHJPAR0013526	ASBRD347-07	98-SRNP-16149	BOLD:AAK9737	649	0	2	JQ850005	0	Yes	Pseudapanteles	Pseudapanteles analorenaguevarae	Daniel H. Janzen	djanzen@sas.upenn.edu	malaise-trapped	98-SRNP-16149 | malaise-trapped	D.H.Janzen&W.Hallwachs		Costa Rica	Guanacaste	Area de Conservacion Guanacaste	Sector Cacao	Sendero Cima	10.9333	-85.4573	1460
DHJPAR0024987	ASHYA326-08	07-SRNP-66449		615	7	1	JQ855477	0	No	Pseudapanteles	Pseudapanteles christianafigueresae	Daniel H. Janzen	djanzen@sas.upenn.edu	malaise-trapped	07-SRNP-66449 | malaise-trapped	D.H.Janzen&W.Hallwachs		Costa Rica	Alajuela	Area de Conservacion Guanacaste	Sector San Cristobal	Rio Blanco Abajo	10.9004	-85.3725	500
DHJPAR0025022	ASHYA361-08	07-SRNP-66484	BOLD:AAA2445	657	0	2	JQ854468	0	Yes	Pseudapanteles	Pseudapanteles margaritapenonae			malaise-trapped	07-SRNP-66484 | malaise-trapped	D.H.Janzen&W.Hallwachs		Costa Rica	Alajuela	Area de Conservacion Guanacaste	Sector San Cristobal	Rio Blanco Abajo	10.9004	-85.3725	500
DHJPAR0025101	ASHYA440-08	07-SRNP-66563	BOLD:AAA2445	640	0	2	JQ852380	0	Yes	Pseudapanteles	Pseudapanteles margaritapenonae	Daniel H. Janzen	djanzen@sas.upenn.edu	malaise-trapped	07-SRNP-66563 | malaise-trapped	D.H.Janzen&W.Hallwachs		Costa Rica	Alajuela	Area de Conservacion Guanacaste	Sector San Cristobal	Rio Blanco Abajo	10.9004	-85.3725	500
DHJPAR0025317	ASHYA656-08	07-SRNP-66779	BOLD:AAA2445	656	0	2	JQ850982	0	Yes	Pseudapanteles	Pseudapanteles margaritapenonae	Daniel H. Janzen	djanzen@sas.upenn.edu	malaise-trapped	07-SRNP-66779 | malaise-trapped	D.H.Janzen&W.Hallwachs		Costa Rica	Alajuela	Area de Conservacion Guanacaste	Sector San Cristobal	Rio Blanco Abajo	10.9004	-85.3725	500
DHJPAR0025447	ASHYA786-08	07-SRNP-66909	BOLD:AAF6051	645	0	0	JQ853864	0	No	Pseudapanteles	Pseudapanteles Whitfield12	Daniel H. Janzen	djanzen@sas.upenn.edu	malaise-trapped	07-SRNP-66909 | malaise-trapped	D.H.Janzen&W.Hallwachs		Costa Rica	Alajuela	Area de Conservacion Guanacaste	Sector Rincon Rainforest	Vado Rio Francia	10.9009	-85.2891	400
DHJPAR0025521	ASHYA860-08	07-SRNP-66983	BOLD:AAA2445	657	0	2	JQ848632	0	Yes	Pseudapanteles	Pseudapanteles margaritapenonae	Daniel H. Janzen	djanzen@sas.upenn.edu	malaise-trapped	07-SRNP-66983 | malaise-trapped	D.H.Janzen&W.Hallwachs		Costa Rica	Alajuela	Area de Conservacion Guanacaste	Sector Rincon Rainforest	Vado Rio Francia	10.9009	-85.2891	400
DHJPAR0025860	ASHYB199-08	07-SRNP-67322	BOLD:AAA2445	618	3	2	JQ850506	0	Yes	Pseudapanteles	Pseudapanteles margaritapenonae	Daniel H. Janzen	djanzen@sas.upenn.edu	malaise-trapped	07-SRNP-67322 | malaise-trapped	D.H.Janzen&W.Hallwachs		Costa Rica	Alajuela	Area de Conservacion Guanacaste	Sector San Cristobal	Estacion San Gerardo	10.8801	-85.3889	575
DHJPAR0039930	ASHYB2217-10	09-SRNP-4997		468	0	2	JQ853960	0	No	Pseudapanteles	Pseudapanteles carlosespinachi	Daniel H. Janzen	djanzen@sas.upenn.edu	Desmia Solis100DHJ01	09-SRNP-4997 | Crambidae	Carolina Cano	12-Oct-2009	Costa Rica	Alajuela	Area de Conservacion Guanacaste	Sector San Cristobal	Rio Blanco Abajo	10.9	-85.373	500
DHJPAR0025960	ASHYB299-08	07-SRNP-67422		611	20	2	JQ854025	0	No	Pseudapanteles	Pseudapanteles christianafigueresae	Daniel H. Janzen	djanzen@sas.upenn.edu	malaise-trapped	07-SRNP-67422 | malaise-trapped	D.H.Janzen&W.Hallwachs		Costa Rica	Alajuela	Area de Conservacion Guanacaste	Sector San Cristobal	Bosque Trampa Malaise	10.8628	-85.3846	815
DHJPAR0026281	ASHYC304-08	08-SRNP-2837	BOLD:AAX8342	657	0	2	JQ852261	0	Yes	Pseudapanteles	Pseudapanteles maureenballesteroae			malaise-trapped	08-SRNP-2837 | malaise-trapped	D.H.Janzen&W.Hallwachs		Costa Rica	Alajuela	Area de Conservacion Guanacaste	Sector San Cristobal	Estacion San Gerardo	10.8801	-85.3889	575
DHJPAR0026336	ASHYC359-08	07-SRNP-67641	BOLD:AAA2445	657	0	2	JQ848163	0	Yes	Pseudapanteles	Pseudapanteles margaritapenonae	Daniel H. Janzen	djanzen@sas.upenn.edu	malaise-trapped	07-SRNP-67641 | malaise-trapped	D.H.Janzen&W.Hallwachs		Costa Rica	Alajuela	Area de Conservacion Guanacaste	Sector San Cristobal	Rio Blanco Abajo	10.9004	-85.3725	500
DHJPAR0026454	ASHYC477-08	08-SRNP-2873	BOLD:AAA2445	656	1	2	JQ849641	0	Yes	Pseudapanteles	Pseudapanteles margaritapenonae	Daniel H. Janzen	djanzen@sas.upenn.edu	malaise-trapped	08-SRNP-2873 | malaise-trapped	D.H.Janzen&W.Hallwachs		Costa Rica	Alajuela	Area de Conservacion Guanacaste	Sector San Cristobal	Rio Blanco Abajo	10.9004	-85.3725	500
DHJPAR0027107	ASHYD133-08	08-SRNP-3526	BOLD:AAA2445	597	3	2	JQ854878	0	Yes	Pseudapanteles	Pseudapanteles margaritapenonae	Daniel H. Janzen	djanzen@sas.upenn.edu	malaise-trapped	08-SRNP-3526 | malaise-trapped	D.H.Janzen&W.Hallwachs		Costa Rica	Alajuela	Area de Conservacion Guanacaste	Sector San Cristobal	Rio Blanco Abajo	10.9004	-85.3725	500
DHJPAR0027375	ASHYD401-08	08-SRNP-3794	BOLD:AAA2445	655	2	2	JQ852227	0	Yes	Pseudapanteles	Pseudapanteles margaritapenonae	Daniel H. Janzen	djanzen@sas.upenn.edu	malaise-trapped	08-SRNP-3794 | malaise-trapped	D.H.Janzen&W.Hallwachs		Costa Rica	Alajuela	Area de Conservacion Guanacaste	Sector San Cristobal	Rio Blanco Abajo	10.9004	-85.3725	500
DHJPAR0027670	ASHYD696-08	08-SRNP-3968		615	14	2	JQ852516	0	No	Pseudapanteles	Pseudapanteles christianafigueresae	Daniel H. Janzen	djanzen@sas.upenn.edu	malaise-trapped	08-SRNP-3968 | malaise-trapped	D.H.Janzen&W.Hallwachs		Costa Rica	Alajuela	Area de Conservacion Guanacaste	Sector San Cristobal	Bosque Trampa Malaise	10.8628	-85.3846	815
DHJPAR0035505	ASHYE1327-09	09-SRNP-1874	BOLD:AAH8195	658	0	2	JQ851843	0	Yes	Pseudapanteles	Pseudapanteles mariocarvajali	Daniel H. Janzen	djanzen@sas.upenn.edu	Stenoma Janzen373	09-SRNP-1874 | Elachistidae	Osvaldo Espinoza	30-May-2009	Costa Rica	Alajuela	Area de Conservacion Guanacaste	Sector San Cristobal	Quebrada Garcia	10.861	-85.426	495
DHJPAR0031202	ASHYG463-10	08-SRNP-38112	BOLD:AAK9737	658	0	2	HQ549965	0	Yes	Pseudapanteles	Pseudapanteles analorenaguevarae	Daniel H. Janzen	djanzen@sas.upenn.edu	malaise-trapped	08-SRNP-38112 | malaise-trapped	D.H.Janzen&W.Hallwachs		Costa Rica	Guanacaste	Area de Conservacion Guanacaste	Sector Cacao	Sendero Circular	10.9271	-85.4668	1185
DHJPAR0031654	ASHYG915-10	08-SRNP-76095	BOLD:AAB2826	658	0	2	HQ550347	0	Yes	Pseudapanteles	Pseudapanteles rosemarykarpinskiae	Daniel H. Janzen	djanzen@sas.upenn.edu	malaise-trapped	08-SRNP-76095 | malaise-trapped	D.H.Janzen&W.Hallwachs		Costa Rica	Guanacaste	Area de Conservacion Guanacaste	Sector Santa Rosa	Area Administrativa	10.8376	-85.6187	295
DHJPAR0043059	ASHYH817-11	11-SRNP-698	BOLD:ABA7261	658	0	2	JQ576586	0	Yes	Pseudapanteles	Pseudapanteles Whitfield27	Daniel H. Janzen	djanzen@sas.upenn.edu	Eulepte Solis	11-SRNP-698 | Crambidae	Elda Araya	01-Mar-2011	Costa Rica	Guanacaste	Area de Conservacion Guanacaste	Sector San Cristobal	Tajo Angeles	10.865	-85.415	540
DHJPAR0013609	ASBD474-07	00-SRNP-24002	BOLD:AAA6667	653	0	2	JQ850342	0	Yes	Pseudapanteles	Pseudapanteles raulsolorzanoi	Daniel H. Janzen	djanzen@sas.upenn.edu	malaise-trapped	00-SRNP-24002 | malaise-trapped	D.H.Janzen&W.Hallwachs		Costa Rica	Guanacaste	Area de Conservacion Guanacaste	Sector Santa Rosa	Bosque Humedo	10.8514	-85.608	290
DHJPAR0013145	ASBRD054-07	99-SRNP-18979	BOLD:AAB2826	657	0	2	JQ847741	0	Yes	Pseudapanteles	Pseudapanteles rosemarykarpinskiae	Daniel H. Janzen	djanzen@sas.upenn.edu	malaise-trapped	99-SRNP-18979 | malaise-trapped	D.H.Janzen&W.Hallwachs		Costa Rica	Guanacaste	Area de Conservacion Guanacaste	Sector Santa Rosa	Bosque San Emilio	10.8439	-85.6138	300
DHJPAR0013420	ASBRD264-07	00-SRNP-23962	BOLD:AAA6667	657	0	2	JQ849259	0	Yes	Pseudapanteles	Pseudapanteles raulsolorzanoi	Daniel H. Janzen	djanzen@sas.upenn.edu	malaise-trapped	00-SRNP-23962 | malaise-trapped	D.H.Janzen&W.Hallwachs		Costa Rica	Guanacaste	Area de Conservacion Guanacaste	Sector Santa Rosa	Bosque Humedo	10.8514	-85.608	290
DHJPAR0024757	ASHYA096-08	08-SRNP-12191	BOLD:AAB2826	645	0	2	JQ849305	0	Yes	Pseudapanteles	Pseudapanteles rosemarykarpinskiae	Daniel H. Janzen	djanzen@sas.upenn.edu	yellow pan-trapped	08-SRNP-12191 | yellow pan-trapped	Andy Deans		Costa Rica	Guanacaste	Area de Conservacion Guanacaste	Sector Santa Rosa	Area Administrativa	10.8376	-85.6187	295
DHJPAR0026088	ASHYB521-08	07-SRNP-67550	BOLD:AAA6668	657	0	2	JQ850352	0	Yes	Pseudapanteles	Pseudapanteles christianafigueresae			malaise-trapped	07-SRNP-67550 | malaise-trapped	D.H.Janzen&W.Hallwachs		Costa Rica	Alajuela	Area de Conservacion Guanacaste	Sector San Cristobal	Bosque Trampa Malaise	10.8628	-85.3846	815
DHJPAR0026267	ASHYC290-08	08-SRNP-2823	BOLD:AAE8275	657	0	2	JQ847175	0	Yes	Pseudapanteles	Pseudapanteles ruficolis	Daniel H. Janzen	djanzen@sas.upenn.edu	malaise-trapped	08-SRNP-2823 | malaise-trapped	D.H.Janzen&W.Hallwachs		Costa Rica	Alajuela	Area de Conservacion Guanacaste	Sector San Cristobal	Estacion San Gerardo	10.8801	-85.3889	575
DHJPAR0026872	ASHYC895-08	08-SRNP-3291	BOLD:AAA2445	414	0	3	JQ847701	0	No	Pseudapanteles	Pseudapanteles margaritapenonae	Daniel H. Janzen	djanzen@sas.upenn.edu	malaise-trapped	08-SRNP-3291 | malaise-trapped	D.H.Janzen&W.Hallwachs		Costa Rica	Alajuela	Area de Conservacion Guanacaste	Sector San Cristobal	Rio Blanco Abajo	10.9004	-85.3725	500
DHJPAR0026940	ASHYC963-08	08-SRNP-3359	BOLD:AAA2445	604	0	1	JQ850759	0	No	Pseudapanteles	Pseudapanteles margaritapenonae	Daniel H. Janzen	djanzen@sas.upenn.edu	malaise-trapped	08-SRNP-3359 | malaise-trapped	D.H.Janzen&W.Hallwachs		Costa Rica	Alajuela	Area de Conservacion Guanacaste	Sector San Cristobal	Rio Blanco Abajo	10.9004	-85.3725	500
DHJPAR0027058	ASHYD084-08	08-SRNP-3477	BOLD:AAA2445	622	0	2	JQ853576	0	Yes	Pseudapanteles	Pseudapanteles margaritapenonae	Daniel H. Janzen	djanzen@sas.upenn.edu	malaise-trapped	08-SRNP-3477 | malaise-trapped	D.H.Janzen&W.Hallwachs		Costa Rica	Alajuela	Area de Conservacion Guanacaste	Sector San Cristobal	Rio Blanco Abajo	10.9004	-85.3725	500
DHJPAR0027128	ASHYD154-08	08-SRNP-3547	BOLD:AAA2445	622	5	2	JQ847713	0	Yes	Pseudapanteles	Pseudapanteles margaritapenonae	Daniel H. Janzen	djanzen@sas.upenn.edu	malaise-trapped	08-SRNP-3547 | malaise-trapped	D.H.Janzen&W.Hallwachs		Costa Rica	Alajuela	Area de Conservacion Guanacaste	Sector San Cristobal	Rio Blanco Abajo	10.9004	-85.3725	500
DHJPAR0031748	ASHYD1672-10	08-SRNP-76189	BOLD:AAB2826	658	0	2	HQ548885	0	Yes	Pseudapanteles	Pseudapanteles rosemarykarpinskiae	Daniel H. Janzen	djanzen@sas.upenn.edu	malaise-trapped	08-SRNP-76189 | malaise-trapped	D.H.Janzen&W.Hallwachs		Costa Rica	Guanacaste	Area de Conservacion Guanacaste	Sector Santa Rosa	Area Administrativa	10.8376	-85.6187	295
DHJPAR0031817	ASHYD1741-10	08-SRNP-76258	BOLD:AAB2826	658	0	2	HQ548946	0	Yes	Pseudapanteles	Pseudapanteles rosemarykarpinskiae	Daniel H. Janzen	djanzen@sas.upenn.edu	malaise-trapped	08-SRNP-76258 | malaise-trapped	D.H.Janzen&W.Hallwachs		Costa Rica	Guanacaste	Area de Conservacion Guanacaste	Sector Santa Rosa	Area Administrativa	10.8376	-85.6187	295
DHJPAR0031835	ASHYD1759-10	08-SRNP-76276	BOLD:AAB2826	658	0	2	HQ548963	0	Yes	Pseudapanteles	Pseudapanteles rosemarykarpinskiae	Daniel H. Janzen	djanzen@sas.upenn.edu	malaise-trapped	08-SRNP-76276 | malaise-trapped	D.H.Janzen&W.Hallwachs		Costa Rica	Guanacaste	Area de Conservacion Guanacaste	Sector Santa Rosa	Area Administrativa	10.8376	-85.6187	295
DHJPAR0031836	ASHYD1760-10	08-SRNP-76277	BOLD:AAB2826	658	0	2	HQ548964	0	Yes	Pseudapanteles	Pseudapanteles rosemarykarpinskiae	Daniel H. Janzen	djanzen@sas.upenn.edu	malaise-trapped	08-SRNP-76277 | malaise-trapped	D.H.Janzen&W.Hallwachs		Costa Rica	Guanacaste	Area de Conservacion Guanacaste	Sector Santa Rosa	Area Administrativa	10.8376	-85.6187	295
DHJPAR0027221	ASHYD247-08	08-SRNP-3640	BOLD:AAW5194	657	0	2	JQ848576	0	Yes	Pseudapanteles	Pseudapanteles munifigueresae	Daniel H. Janzen	djanzen@sas.upenn.edu	malaise-trapped	08-SRNP-3640 | malaise-trapped	D.H.Janzen&W.Hallwachs		Costa Rica	Alajuela	Area de Conservacion Guanacaste	Sector San Cristobal	Rio Blanco Abajo	10.9004	-85.3725	500
DHJPAR0027255	ASHYD281-08	08-SRNP-3674	BOLD:AAA2445	631	0	1	JQ853235	0	No	Pseudapanteles	Pseudapanteles margaritapenonae	Daniel H. Janzen	djanzen@sas.upenn.edu	malaise-trapped	08-SRNP-3674 | malaise-trapped	D.H.Janzen&W.Hallwachs		Costa Rica	Alajuela	Area de Conservacion Guanacaste	Sector San Cristobal	Rio Blanco Abajo	10.9004	-85.3725	500
DHJPAR0027346	ASHYD372-08	08-SRNP-3765	BOLD:AAA2445	657	0	2	JQ854125	0	Yes	Pseudapanteles	Pseudapanteles margaritapenonae	Daniel H. Janzen	djanzen@sas.upenn.edu	malaise-trapped	08-SRNP-3765 | malaise-trapped	D.H.Janzen&W.Hallwachs		Costa Rica	Alajuela	Area de Conservacion Guanacaste	Sector San Cristobal	Rio Blanco Abajo	10.9004	-85.3725	500
DHJPAR0027400	ASHYD426-08	08-SRNP-3819	BOLD:AAA2445	657	0	2	JQ851303	0	Yes	Pseudapanteles	Pseudapanteles margaritapenonae	Daniel H. Janzen	djanzen@sas.upenn.edu	malaise-trapped	08-SRNP-3819 | malaise-trapped	D.H.Janzen&W.Hallwachs		Costa Rica	Alajuela	Area de Conservacion Guanacaste	Sector San Cristobal	Rio Blanco Abajo	10.9004	-85.3725	500
DHJPAR0027410	ASHYD436-08	08-SRNP-3829	BOLD:AAA2445	656	1	2	JQ849846	0	Yes	Pseudapanteles	Pseudapanteles margaritapenonae	Daniel H. Janzen	djanzen@sas.upenn.edu	malaise-trapped	08-SRNP-3829 | malaise-trapped	D.H.Janzen&W.Hallwachs		Costa Rica	Alajuela	Area de Conservacion Guanacaste	Sector San Cristobal	Rio Blanco Abajo	10.9004	-85.3725	500
DHJPAR0027658	ASHYD684-08	08-SRNP-3956	BOLD:AAA6668	620	2	2	JQ850562	0	Yes	Pseudapanteles	Pseudapanteles christianafigueresae	Daniel H. Janzen	djanzen@sas.upenn.edu	malaise-trapped	08-SRNP-3956 | malaise-trapped	D.H.Janzen&W.Hallwachs		Costa Rica	Alajuela	Area de Conservacion Guanacaste	Sector San Cristobal	Bosque Trampa Malaise	10.8628	-85.3846	815
DHJPAR0033731	ASHYG001-10	08-SRNP-37650	BOLD:AAE0922	658	0	2	HQ549580	0	Yes	Pseudapanteles	Pseudapanteles alvaroumanai	Daniel H. Janzen	djanzen@sas.upenn.edu	malaise-trapped	08-SRNP-37650 | malaise-trapped	D.H.Janzen&W.Hallwachs		Costa Rica	Guanacaste	Area de Conservacion Guanacaste	Sector Cacao	Cerro Pedregal	10.9277	-85.4745	1080
DHJPAR0033744	ASHYG014-10	08-SRNP-37663	BOLD:AAE0922	658	0	2	HQ549592	0	Yes	Pseudapanteles	Pseudapanteles alvaroumanai	Daniel H. Janzen	djanzen@sas.upenn.edu	malaise-trapped	08-SRNP-37663 | malaise-trapped	D.H.Janzen&W.Hallwachs		Costa Rica	Guanacaste	Area de Conservacion Guanacaste	Sector Cacao	Cerro Pedregal	10.9277	-85.4745	1080
DHJPAR0033906	ASHYG176-10	08-SRNP-37825	BOLD:AAE0922	658	0	2	HQ549736	0	Yes	Pseudapanteles	Pseudapanteles alvaroumanai			malaise-trapped	08-SRNP-37825 | malaise-trapped	D.H.Janzen&W.Hallwachs		Costa Rica	Guanacaste	Area de Conservacion Guanacaste	Sector Cacao	Sendero Arenales	10.9247	-85.4674	1080
DHJPAR0031186	ASHYG447-10	08-SRNP-38096	BOLD:AAK9737	658	0	2	HQ549950	0	Yes	Pseudapanteles	Pseudapanteles analorenaguevarae	Daniel H. Janzen	djanzen@sas.upenn.edu	malaise-trapped	08-SRNP-38096 | malaise-trapped	D.H.Janzen&W.Hallwachs		Costa Rica	Guanacaste	Area de Conservacion Guanacaste	Sector Cacao	Sendero Circular	10.9271	-85.4668	1185
DHJPAR0031332	ASHYG593-10	08-SRNP-38242	BOLD:AAK9737	658	0	2	HQ550084	0	Yes	Pseudapanteles	Pseudapanteles analorenaguevarae	Daniel H. Janzen	djanzen@sas.upenn.edu	malaise-trapped	08-SRNP-38242 | malaise-trapped	D.H.Janzen&W.Hallwachs		Costa Rica	Guanacaste	Area de Conservacion Guanacaste	Sector Cacao	Sendero Arenales	10.9247	-85.4674	1080
DHJPAR0013422	ASBRD278-07	00-SRNP-23982	BOLD:AAA6667	615	0	4	JQ854216	0	Yes	Pseudapanteles	Pseudapanteles raulsolorzanoi	Daniel H. Janzen	djanzen@sas.upenn.edu	malaise-trapped	00-SRNP-23982 | malaise-trapped	D.H.Janzen&W.Hallwachs		Costa Rica	Guanacaste	Area de Conservacion Guanacaste	Sector Santa Rosa	Bosque Humedo	10.8514	-85.608	290
DHJPAR0024709	ASHYA048-08	99-SRNP-19277	BOLD:AAB2826	657	0	2	JQ846854	0	Yes	Pseudapanteles	Pseudapanteles rosemarykarpinskiae	Daniel H. Janzen	djanzen@sas.upenn.edu	malaise-trapped	99-SRNP-19277 | malaise-trapped	D.H.Janzen&W.Hallwachs		Costa Rica	Guanacaste		Sector Santa Rosa	Bosque San Emilio	10.8439	-85.6138	300
DHJPAR0024751	ASHYA090-08	08-SRNP-12185	BOLD:AAB2826	653	0	2	JQ849714	0	Yes	Pseudapanteles	Pseudapanteles rosemarykarpinskiae	Daniel H. Janzen	djanzen@sas.upenn.edu	yellow pan-trapped	08-SRNP-12185 | yellow pan-trapped	Andy Deans		Costa Rica	Guanacaste	Area de Conservacion Guanacaste	Sector Santa Rosa	Area Administrativa	10.8376	-85.6187	295
DHJPAR0024754	ASHYA093-08	08-SRNP-12188	BOLD:AAB2826	655	0	2	JQ854048	0	Yes	Pseudapanteles	Pseudapanteles rosemarykarpinskiae	Daniel H. Janzen	djanzen@sas.upenn.edu	yellow pan-trapped	08-SRNP-12188 | yellow pan-trapped	Andy Deans		Costa Rica	Guanacaste	Area de Conservacion Guanacaste	Sector Santa Rosa	Area Administrativa	10.8376	-85.6187	295
DHJPAR0025075	ASHYA414-08	07-SRNP-66537	BOLD:AAA2445	629	0	2	JQ847228	0	Yes	Pseudapanteles	Pseudapanteles margaritapenonae	Daniel H. Janzen	djanzen@sas.upenn.edu	malaise-trapped	07-SRNP-66537 | malaise-trapped	D.H.Janzen&W.Hallwachs		Costa Rica	Alajuela	Area de Conservacion Guanacaste	Sector San Cristobal	Rio Blanco Abajo	10.9004	-85.3725	500
DHJPAR0025675	ASHYB014-08	07-SRNP-67137		286	0	3	KJ840816	0	No	Pseudapanteles	Pseudapanteles laurachinchillae	Daniel H. Janzen	djanzen@sas.upenn.edu	malaise-trapped	07-SRNP-67137 | malaise-trapped	D.H.Janzen&W.Hallwachs		Costa Rica	Alajuela	Area de Conservacion Guanacaste	Sector San Cristobal	Potrero Argentina	10.8902	-85.388	520
DHJPAR0025751	ASHYB090-08	07-SRNP-67213	BOLD:AAX8358	626	4	2	JQ849914	0	Yes	Pseudapanteles	Pseudapanteles josefigueresi			malaise-trapped	07-SRNP-67213 | malaise-trapped	D.H.Janzen&W.Hallwachs		Costa Rica	Alajuela	Area de Conservacion Guanacaste	Sector San Cristobal	Potrero Argentina	10.8902	-85.388	520
DHJPAR0025831	ASHYB170-08	07-SRNP-67293	BOLD:AAA2445	648	0	2	JQ853458	0	Yes	Pseudapanteles	Pseudapanteles margaritapenonae			malaise-trapped	07-SRNP-67293 | malaise-trapped	D.H.Janzen&W.Hallwachs		Costa Rica	Alajuela	Area de Conservacion Guanacaste	Sector San Cristobal	Estacion San Gerardo	10.8801	-85.3889	575
DHJPAR0025858	ASHYB197-08	07-SRNP-67320	BOLD:AAA2445	653	4	2	JQ847013	0	Yes	Pseudapanteles	Pseudapanteles margaritapenonae	Daniel H. Janzen	djanzen@sas.upenn.edu	malaise-trapped	07-SRNP-67320 | malaise-trapped	D.H.Janzen&W.Hallwachs		Costa Rica	Alajuela	Area de Conservacion Guanacaste	Sector San Cristobal	Estacion San Gerardo	10.8801	-85.3889	575
DHJPAR0025985	ASHYB418-08	07-SRNP-67447		613	7	2	JQ852949	0	No	Pseudapanteles	Pseudapanteles christianafigueresae	Daniel H. Janzen	djanzen@sas.upenn.edu	malaise-trapped	07-SRNP-67447 | malaise-trapped	D.H.Janzen&W.Hallwachs		Costa Rica	Alajuela	Area de Conservacion Guanacaste	Sector San Cristobal	Bosque Trampa Malaise	10.8628	-85.3846	815
DHJPAR0026653	ASHYC676-08	08-SRNP-3072	BOLD:AAA2445	657	0	0	JQ849817	0	No	Pseudapanteles	Pseudapanteles margaritapenonae	Daniel H. Janzen	djanzen@sas.upenn.edu	malaise-trapped	08-SRNP-3072 | malaise-trapped	D.H.Janzen&W.Hallwachs		Costa Rica	Alajuela	Area de Conservacion Guanacaste	Sector San Cristobal	Rio Blanco Abajo	10.9004	-85.3725	500
DHJPAR0026690	ASHYC713-08	08-SRNP-3109	BOLD:AAA2445	657	0	0	JQ852510	0	No	Pseudapanteles	Pseudapanteles margaritapenonae	Daniel H. Janzen	djanzen@sas.upenn.edu	malaise-trapped	08-SRNP-3109 | malaise-trapped	D.H.Janzen&W.Hallwachs		Costa Rica	Alajuela	Area de Conservacion Guanacaste	Sector San Cristobal	Rio Blanco Abajo	10.9004	-85.3725	500
DHJPAR0026731	ASHYC754-08	08-SRNP-3150	BOLD:AAA2445	656	1	0	JQ848879	0	No	Pseudapanteles	Pseudapanteles margaritapenonae	Daniel H. Janzen	djanzen@sas.upenn.edu	malaise-trapped	08-SRNP-3150 | malaise-trapped	D.H.Janzen&W.Hallwachs		Costa Rica	Alajuela	Area de Conservacion Guanacaste	Sector San Cristobal	Rio Blanco Abajo	10.9004	-85.3725	500
DHJPAR0026783	ASHYC806-08	08-SRNP-3202	BOLD:AAA2445	631	0	2	JQ849820	0	Yes	Pseudapanteles	Pseudapanteles margaritapenonae	Daniel H. Janzen	djanzen@sas.upenn.edu	malaise-trapped	08-SRNP-3202 | malaise-trapped	D.H.Janzen&W.Hallwachs		Costa Rica	Alajuela	Area de Conservacion Guanacaste	Sector San Cristobal	Rio Blanco Abajo	10.9004	-85.3725	500
DHJPAR0027076	ASHYD102-08	08-SRNP-3495	BOLD:AAA2445	600	0	2	JQ853078	0	Yes	Pseudapanteles	Pseudapanteles margaritapenonae	Daniel H. Janzen	djanzen@sas.upenn.edu	malaise-trapped	08-SRNP-3495 | malaise-trapped	D.H.Janzen&W.Hallwachs		Costa Rica	Alajuela	Area de Conservacion Guanacaste	Sector San Cristobal	Rio Blanco Abajo	10.9004	-85.3725	500
DHJPAR0027164	ASHYD190-08	08-SRNP-3583	BOLD:AAA6668	594	1	2	JQ847000	0	Yes	Pseudapanteles	Pseudapanteles christianafigueresae	Daniel H. Janzen	djanzen@sas.upenn.edu	malaise-trapped	08-SRNP-3583 | malaise-trapped	D.H.Janzen&W.Hallwachs		Costa Rica	Alajuela	Area de Conservacion Guanacaste	Sector San Cristobal	Rio Blanco Abajo	10.9004	-85.3725	500
DHJPAR0039022	ASHYD2595-10	10-SRNP-981	BOLD:AAH8195	658	0	2	HQ549480	0	Yes	Pseudapanteles	Pseudapanteles mariocarvajali	Daniel H. Janzen	djanzen@sas.upenn.edu	Chlamydastis Janzen	10-SRNP-981 | Elachistidae	Elda Araya	10-Mar-2010	Costa Rica	Alajuela	Area de Conservacion Guanacaste	Sector San Cristobal	Tajo Angeles	10.865	-85.415	540
DHJPAR0027252	ASHYD278-08	08-SRNP-3671	BOLD:AAA2445	631	0	1	JQ849854	0	No	Pseudapanteles	Pseudapanteles margaritapenonae	Daniel H. Janzen	djanzen@sas.upenn.edu	malaise-trapped	08-SRNP-3671 | malaise-trapped	D.H.Janzen&W.Hallwachs		Costa Rica	Alajuela	Area de Conservacion Guanacaste	Sector San Cristobal	Rio Blanco Abajo	10.9004	-85.3725	500
DHJPAR0027369	ASHYD395-08	08-SRNP-3788	BOLD:AAA2445	631	0	2	JQ854163	0	Yes	Pseudapanteles	Pseudapanteles margaritapenonae	Daniel H. Janzen	djanzen@sas.upenn.edu	malaise-trapped	08-SRNP-3788 | malaise-trapped	D.H.Janzen&W.Hallwachs		Costa Rica	Alajuela	Area de Conservacion Guanacaste	Sector San Cristobal	Rio Blanco Abajo	10.9004	-85.3725	500
DHJPAR0027451	ASHYD477-08	08-SRNP-3870	BOLD:AAA2445	649	0	2	JQ850264	0	Yes	Pseudapanteles	Pseudapanteles margaritapenonae	Daniel H. Janzen	djanzen@sas.upenn.edu	malaise-trapped	08-SRNP-3870 | malaise-trapped	D.H.Janzen&W.Hallwachs		Costa Rica	Alajuela	Area de Conservacion Guanacaste	Sector San Cristobal	Rio Blanco Abajo	10.9004	-85.3725	500
DHJPAR0027692	ASHYD718-08	08-SRNP-3990	BOLD:AAA6668	619	2	1	JQ852287	0	No	Pseudapanteles	Pseudapanteles christianafigueresae			malaise-trapped	08-SRNP-3990 | malaise-trapped	D.H.Janzen&W.Hallwachs		Costa Rica	Alajuela	Area de Conservacion Guanacaste	Sector San Cristobal	Bosque Trampa Malaise	10.8628	-85.3846	815
DHJPAR0027701	ASHYD727-08	08-SRNP-3999	BOLD:AAA6668	596	0	4	JQ849153	0	Yes	Pseudapanteles	Pseudapanteles christianafigueresae	Daniel H. Janzen	djanzen@sas.upenn.edu	malaise-trapped	08-SRNP-3999 | malaise-trapped	D.H.Janzen&W.Hallwachs		Costa Rica	Alajuela	Area de Conservacion Guanacaste	Sector San Cristobal	Bosque Trampa Malaise	10.8628	-85.3846	815
DHJPAR0041975	ASHYF1881-11	10-SRNP-5700	BOLD:AAH8195	658	0	2	JQ575683	0	Yes	Pseudapanteles	Pseudapanteles mariocarvajali	Daniel H. Janzen	djanzen@sas.upenn.edu	Stenoma Janzen373	10-SRNP-5700 | Elachistidae	Gloria Sihezar	27-Oct-2010	Costa Rica	Alajuela	Area de Conservacion Guanacaste	Sector San Cristobal	Tajo Angeles	10.865	-85.415	540
DHJPAR0031411	ASHYG672-10	08-SRNP-38321	BOLD:AAE0922	658	0	2	HQ550154	0	Yes	Pseudapanteles	Pseudapanteles alvaroumanai	Daniel H. Janzen	djanzen@sas.upenn.edu	malaise-trapped	08-SRNP-38321 | malaise-trapped	D.H.Janzen&W.Hallwachs		Costa Rica	Guanacaste	Area de Conservacion Guanacaste	Sector Cacao	Cerro Pedregal	10.9277	-85.4745	1080
DHJPAR0043037	ASHYH795-11	11-SRNP-41918	BOLD:AAM1093	658	0	2	JQ576569	0	Yes	Pseudapanteles	Pseudapanteles oscarariasi	Daniel H. Janzen	djanzen@sas.upenn.edu	elachistid 11-SRNP-41918	Elachistidae	Pablo Umana Calderon		Costa Rica	Guanacaste	Area de Conservacion Guanacaste	Sector Rincon Rain Forest	Sendero Anonas	10.905	-85.279	405
DHJPAR0050029	ACGAZ1343-12	12-SRNP-71699	BOLD:ACC0954	658	0	2	KJ840822	0	Yes	Pseudapanteles	Pseudapanteles Janzen02	Daniel H. Janzen	djanzen@sas.upenn.edu	same as 12-SRNP-71591	Crambidae	Ricardo Calero	22-Jul-2012	Costa Rica	Guanacaste	Area de Conservacion Guanacaste	Sector Pitilla	Medrano
DHJPAR0048162	ACGBA1704-12	11-SRNP-20784	BOLD:ABX4834	658	0	2	KJ840808	0	Yes	Pseudapanteles	Pseudapanteles teophilodelatorrei	Daniel H. Janzen	djanzen@sas.upenn.edu	see description	Elachistidae	Roster Moraga	16-May-2011	Costa Rica	Guanacaste	Area de Conservacion Guanacaste	Sector El Hacha	Quebrada La Leona
DHJPAR0012573	ASBD080-07	06-SRNP-98016	BOLD:AAB2826	656	0	2	JQ848758	0	Yes	Pseudapanteles	Pseudapanteles rosemarykarpinskiae	Daniel H. Janzen	djanzen@sas.upenn.edu	malaise-trapped	06-SRNP-98016 | malaise-trapped	J.Rodriguez		Costa Rica	Guanacaste	Area de Conservacion Guanacaste	Sector Santa Rosa	Bosque San Emilio	10.8439	-85.6138	300
DHJPAR0013151	ASBRD208-07	07-SRNP-15041	BOLD:AAB2826	656	1	2	JQ849362	0	Yes	Pseudapanteles	Pseudapanteles rosemarykarpinskiae	Daniel H. Janzen	djanzen@sas.upenn.edu	yellow pan-trapped	07-SRNP-15041 | yellow pan-trapped	A. R. Deans		Costa Rica	Guanacaste	Area de Conservacion Guanacaste	Sector Santa Rosa	Bosque San Emilio	10.8439	-85.6138	300
DHJPAR0013249	ASBRD211-07	07-SRNP-15044	BOLD:AAB2826	657	0	2	JQ851496	0	Yes	Pseudapanteles	Pseudapanteles rosemarykarpinskiae	Daniel H. Janzen	djanzen@sas.upenn.edu	yellow pan-trapped	07-SRNP-15044 | yellow pan-trapped	A. R. Deans		Costa Rica	Guanacaste	Area de Conservacion Guanacaste	Sector Santa Rosa	Bosque San Emilio	10.8439	-85.6138	300
DHJPAR0013425	ASBRD259-07	99-SRNP-19111	BOLD:AAA6667	657	0	2	JQ851811	0	Yes	Pseudapanteles	Pseudapanteles raulsolorzanoi	Daniel H. Janzen	djanzen@sas.upenn.edu	malaise-trapped	99-SRNP-19111 | malaise-trapped	D.H.Janzen&W.Hallwachs		Costa Rica	Guanacaste	Area de Conservacion Guanacaste	Sector Santa Rosa	Bosque Humedo	10.8514	-85.608	290
DHJPAR0013404	ASBRD291-07	00-SRNP-23997	BOLD:AAA6667	657	0	2	JQ850956	0	Yes	Pseudapanteles	Pseudapanteles raulsolorzanoi	Daniel H. Janzen	djanzen@sas.upenn.edu	malaise-trapped	00-SRNP-23997 | malaise-trapped	D.H.Janzen&W.Hallwachs		Costa Rica	Guanacaste	Area de Conservacion Guanacaste	Sector Santa Rosa	Bosque Humedo	10.8514	-85.608	290
DHJPAR0025061	ASHYA400-08	07-SRNP-66523	BOLD:AAA2445	618	0	2	JQ854261	0	Yes	Pseudapanteles	Pseudapanteles margaritapenonae	Daniel H. Janzen	djanzen@sas.upenn.edu	malaise-trapped	07-SRNP-66523 | malaise-trapped	D.H.Janzen&W.Hallwachs		Costa Rica	Alajuela	Area de Conservacion Guanacaste	Sector San Cristobal	Rio Blanco Abajo	10.9004	-85.3725	500
DHJPAR0025079	ASHYA418-08	07-SRNP-66541	BOLD:AAA2445	623	3	2	JQ850011	0	Yes	Pseudapanteles	Pseudapanteles margaritapenonae	Daniel H. Janzen	djanzen@sas.upenn.edu	malaise-trapped	07-SRNP-66541 | malaise-trapped	D.H.Janzen&W.Hallwachs		Costa Rica	Alajuela	Area de Conservacion Guanacaste	Sector San Cristobal	Rio Blanco Abajo	10.9004	-85.3725	500
DHJPAR0025449	ASHYA788-08	07-SRNP-66911	BOLD:AAA2445	657	0	0	JQ848682	0	No	Pseudapanteles	Pseudapanteles margaritapenonae	Daniel H. Janzen	djanzen@sas.upenn.edu	malaise-trapped	07-SRNP-66911 | malaise-trapped	D.H.Janzen&W.Hallwachs		Costa Rica	Alajuela	Area de Conservacion Guanacaste	Sector Rincon Rainforest	Vado Rio Francia	10.9009	-85.2891	400
DHJPAR0025824	ASHYB163-08	07-SRNP-67286	BOLD:AAA2445	561	3	2	JQ850428	0	Yes	Pseudapanteles	Pseudapanteles margaritapenonae	Daniel H. Janzen	djanzen@sas.upenn.edu	malaise-trapped	07-SRNP-67286 | malaise-trapped	D.H.Janzen&W.Hallwachs		Costa Rica	Alajuela	Area de Conservacion Guanacaste	Sector San Cristobal	Estacion San Gerardo	10.8801	-85.3889	575
DHJPAR0039928	ASHYB2215-10	09-SRNP-42626	BOLD:AAK9732	555	0	2	JQ574544	0	Yes	Pseudapanteles	Pseudapanteles carlosespinachi	Daniel H. Janzen	djanzen@sas.upenn.edu	Desmia Solis100DHJ01	09-SRNP-42626 | Crambidae	Pablo Umana Calderon	05-Oct-2009	Costa Rica	Alajuela	Area de Conservacion Guanacaste	Sector Rincon Rain Forest	Quebrada Escondida	10.899	-85.275	420
DHJPAR0026525	ASHYC548-08	08-SRNP-2944	BOLD:AAA2445	657	0	2	JQ851974	0	Yes	Pseudapanteles	Pseudapanteles margaritapenonae	Daniel H. Janzen	djanzen@sas.upenn.edu	malaise-trapped	08-SRNP-2944 | malaise-trapped	D.H.Janzen&W.Hallwachs		Costa Rica	Alajuela	Area de Conservacion Guanacaste	Sector San Cristobal	Rio Blanco Abajo	10.9004	-85.3725	500
DHJPAR0026964	ASHYC987-08	08-SRNP-3383	BOLD:AAA2445	657	0	2	JQ848932	0	Yes	Pseudapanteles	Pseudapanteles margaritapenonae	Daniel H. Janzen	djanzen@sas.upenn.edu	malaise-trapped	08-SRNP-3383 | malaise-trapped	D.H.Janzen&W.Hallwachs		Costa Rica	Alajuela	Area de Conservacion Guanacaste	Sector San Cristobal	Rio Blanco Abajo	10.9004	-85.3725	500
DHJPAR0027151	ASHYD177-08	08-SRNP-3570	BOLD:AAA2445	621	1	2	JQ853041	0	Yes	Pseudapanteles	Pseudapanteles margaritapenonae	Daniel H. Janzen	djanzen@sas.upenn.edu	malaise-trapped	08-SRNP-3570 | malaise-trapped	D.H.Janzen&W.Hallwachs		Costa Rica	Alajuela	Area de Conservacion Guanacaste	Sector San Cristobal	Rio Blanco Abajo	10.9004	-85.3725	500
DHJPAR0038377	ASHYD1950-10	10-SRNP-20229	BOLD:AAM1093	658	0	2	HQ549124	0	Yes	Pseudapanteles	Pseudapanteles oscarariasi	Daniel H. Janzen	djanzen@sas.upenn.edu	elachistid 10-SRNP-20229	Elachistidae	Lucia Rios	09-Feb-2010	Costa Rica	Guanacaste	Area de Conservacion Guanacaste	Del Oro	Monte Cristo	11.014	-85.425	525
DHJPAR0027193	ASHYD219-08	08-SRNP-3612	BOLD:AAA2445	624	3	2	JQ854114	0	Yes	Pseudapanteles	Pseudapanteles margaritapenonae	Daniel H. Janzen	djanzen@sas.upenn.edu	malaise-trapped	08-SRNP-3612 | malaise-trapped	D.H.Janzen&W.Hallwachs		Costa Rica	Alajuela	Area de Conservacion Guanacaste	Sector San Cristobal	Rio Blanco Abajo	10.9004	-85.3725	500
DHJPAR0027405	ASHYD431-08	08-SRNP-3824	BOLD:AAA2445	657	0	2	JQ855215	0	Yes	Pseudapanteles	Pseudapanteles margaritapenonae	Daniel H. Janzen	djanzen@sas.upenn.edu	malaise-trapped	08-SRNP-3824 | malaise-trapped	D.H.Janzen&W.Hallwachs		Costa Rica	Alajuela	Area de Conservacion Guanacaste	Sector San Cristobal	Rio Blanco Abajo	10.9004	-85.3725	500
DHJPAR0027437	ASHYD463-08	08-SRNP-3856	BOLD:AAA2445	633	0	2	JQ847862	0	Yes	Pseudapanteles	Pseudapanteles margaritapenonae	Daniel H. Janzen	djanzen@sas.upenn.edu	malaise-trapped	08-SRNP-3856 | malaise-trapped	D.H.Janzen&W.Hallwachs		Costa Rica	Alajuela	Area de Conservacion Guanacaste	Sector San Cristobal	Rio Blanco Abajo	10.9004	-85.3725	500
DHJPAR0027621	ASHYD647-08	07-SRNP-67825		298	1	4	KJ840818	0	No	Pseudapanteles	Pseudapanteles christianafigueresae	Daniel H. Janzen	djanzen@sas.upenn.edu	malaise-trapped	07-SRNP-67825 | malaise-trapped	D.H.Janzen&W.Hallwachs		Costa Rica	Alajuela	Area de Conservacion Guanacaste	Sector San Cristobal	Bosque Trampa Malaise	10.8628	-85.3846	815
DHJPAR0027655	ASHYD681-08	08-SRNP-3953	BOLD:AAA6668	600	0	4	JQ854070	0	Yes	Pseudapanteles	Pseudapanteles christianafigueresae	Daniel H. Janzen	djanzen@sas.upenn.edu	malaise-trapped	08-SRNP-3953 | malaise-trapped	D.H.Janzen&W.Hallwachs		Costa Rica	Alajuela	Area de Conservacion Guanacaste	Sector San Cristobal	Bosque Trampa Malaise	10.8628	-85.3846	815
DHJPAR0041914	ASHYF1820-11	10-SRNP-5519	BOLD:AAH8195	658	0	2	JQ575645	0	Yes	Pseudapanteles	Pseudapanteles mariocarvajali			Stenoma Janzen373	10-SRNP-5519 | Elachistidae	Elda Araya	16-Oct-2010	Costa Rica	Alajuela	Area de Conservacion Guanacaste	Sector San Cristobal	Tajo Angeles	10.865	-85.415	540
DHJPAR0042032	ASHYF1938-11	10-SRNP-5193	BOLD:AAH8195	543	0	1	JQ851715	0	No	Pseudapanteles	Pseudapanteles mariocarvajali	Daniel H. Janzen	djanzen@sas.upenn.edu	Stenoma Janzen373	10-SRNP-5193 | Elachistidae	Gloria Sihezar	02-Oct-2010	Costa Rica	Alajuela	Area de Conservacion Guanacaste	Sector San Cristobal	Tajo Angeles	10.865	-85.415	540
DHJPAR0033742	ASHYG012-10	08-SRNP-37661	BOLD:AAE0922	658	0	2	HQ549590	0	Yes	Pseudapanteles	Pseudapanteles alvaroumanai	Daniel H. Janzen	djanzen@sas.upenn.edu	malaise-trapped	08-SRNP-37661 | malaise-trapped	D.H.Janzen&W.Hallwachs		Costa Rica	Guanacaste	Area de Conservacion Guanacaste	Sector Cacao	Cerro Pedregal	10.9277	-85.4745	1080
DHJPAR0031715	ASHYG976-10	08-SRNP-76156	BOLD:AAB2826	658	0	2	HQ550402	0	Yes	Pseudapanteles	Pseudapanteles rosemarykarpinskiae	Daniel H. Janzen	djanzen@sas.upenn.edu	malaise-trapped	08-SRNP-76156 | malaise-trapped	D.H.Janzen&W.Hallwachs		Costa Rica	Guanacaste	Area de Conservacion Guanacaste	Sector Santa Rosa	Area Administrativa	10.8376	-85.6187	295
DHJPAR0012574	ASBD081-07	06-SRNP-98017	BOLD:AAB2826	657	0	2	JQ849291	0	Yes	Pseudapanteles	Pseudapanteles rosemarykarpinskiae	Daniel H. Janzen	djanzen@sas.upenn.edu	malaise-trapped	06-SRNP-98017 | malaise-trapped	J.Rodriguez		Costa Rica	Guanacaste	Area de Conservacion Guanacaste	Sector Santa Rosa	Bosque San Emilio	10.8439	-85.6138	300
DHJPAR0013143	ASBRD047-07	99-SRNP-18969	BOLD:AAB2826	656	1	2	JQ848088	0	Yes	Pseudapanteles	Pseudapanteles rosemarykarpinskiae	Daniel H. Janzen	djanzen@sas.upenn.edu	malaise-trapped	99-SRNP-18969 | malaise-trapped	D.H.Janzen&W.Hallwachs		Costa Rica	Guanacaste	Area de Conservacion Guanacaste	Sector Santa Rosa	Bosque San Emilio	10.8439	-85.6138	300
DHJPAR0013246	ASBRD214-07	07-SRNP-15047		387	10	4	JQ847055	0	No	Pseudapanteles	Pseudapanteles rosemarykarpinskiae	Daniel H. Janzen	djanzen@sas.upenn.edu	yellow pan-trapped	07-SRNP-15047 | yellow pan-trapped	A. R. Deans		Costa Rica	Guanacaste	Area de Conservacion Guanacaste	Sector Santa Rosa	Bosque San Emilio	10.8439	-85.6138	300
DHJPAR0025109	ASHYA448-08	07-SRNP-66571	BOLD:AAA2445	657	0	2	JQ851142	0	Yes	Pseudapanteles	Pseudapanteles margaritapenonae	Daniel H. Janzen	djanzen@sas.upenn.edu	malaise-trapped	07-SRNP-66571 | malaise-trapped	D.H.Janzen&W.Hallwachs		Costa Rica	Alajuela	Area de Conservacion Guanacaste	Sector San Cristobal	Rio Blanco Abajo	10.9004	-85.3725	500
DHJPAR0025470	ASHYA809-08	07-SRNP-66932	BOLD:AAA2445	657	0	0	JQ854851	0	No	Pseudapanteles	Pseudapanteles margaritapenonae	Daniel H. Janzen	djanzen@sas.upenn.edu	malaise-trapped	07-SRNP-66932 | malaise-trapped	D.H.Janzen&W.Hallwachs		Costa Rica	Alajuela	Area de Conservacion Guanacaste	Sector Rincon Rainforest	Vado Rio Francia	10.9009	-85.2891	400
DHJPAR0039450	ASHYB1738-10	10-SRNP-2419	BOLD:AAM1093	577	0	3	JN281482	0	Yes	Pseudapanteles	Pseudapanteles oscarariasi	Daniel H. Janzen	djanzen@sas.upenn.edu	Antaeotricha Janzen888	10-SRNP-2419 | Elachistidae	Elda Araya	31-May-2010	Costa Rica	Alajuela	Area de Conservacion Guanacaste	Sector San Cristobal	Sendero Albergue Crater	10.849	-85.328	980
DHJPAR0026012	ASHYB445-08	07-SRNP-67474	BOLD:AAA6668	647	2	2	JQ852705	0	Yes	Pseudapanteles	Pseudapanteles christianafigueresae			malaise-trapped	07-SRNP-67474 | malaise-trapped	D.H.Janzen&W.Hallwachs		Costa Rica	Alajuela	Area de Conservacion Guanacaste	Sector San Cristobal	Bosque Trampa Malaise	10.8628	-85.3846	815
DHJPAR0026464	ASHYC487-08	08-SRNP-2883	BOLD:AAA2445	655	2	2	JQ848900	0	Yes	Pseudapanteles	Pseudapanteles margaritapenonae	Daniel H. Janzen	djanzen@sas.upenn.edu	malaise-trapped	08-SRNP-2883 | malaise-trapped	D.H.Janzen&W.Hallwachs		Costa Rica	Alajuela	Area de Conservacion Guanacaste	Sector San Cristobal	Rio Blanco Abajo	10.9004	-85.3725	500
DHJPAR0026511	ASHYC534-08	08-SRNP-2930	BOLD:AAA2445	657	0	2	JQ854537	0	Yes	Pseudapanteles	Pseudapanteles margaritapenonae	Daniel H. Janzen	djanzen@sas.upenn.edu	malaise-trapped	08-SRNP-2930 | malaise-trapped	D.H.Janzen&W.Hallwachs		Costa Rica	Alajuela	Area de Conservacion Guanacaste	Sector San Cristobal	Rio Blanco Abajo	10.9004	-85.3725	500
DHJPAR0026752	ASHYC775-08	08-SRNP-3171	BOLD:AAA2445	653	4	0	JQ854353	0	No	Pseudapanteles	Pseudapanteles margaritapenonae	Daniel H. Janzen	djanzen@sas.upenn.edu	malaise-trapped	08-SRNP-3171 | malaise-trapped	D.H.Janzen&W.Hallwachs		Costa Rica	Alajuela	Area de Conservacion Guanacaste	Sector San Cristobal	Rio Blanco Abajo	10.9004	-85.3725	500
DHJPAR0026769	ASHYC792-08	08-SRNP-3188	BOLD:AAA2445	657	0	2	JQ851248	0	Yes	Pseudapanteles	Pseudapanteles margaritapenonae	Daniel H. Janzen	djanzen@sas.upenn.edu	malaise-trapped	08-SRNP-3188 | malaise-trapped	D.H.Janzen&W.Hallwachs		Costa Rica	Alajuela	Area de Conservacion Guanacaste	Sector San Cristobal	Rio Blanco Abajo	10.9004	-85.3725	500
DHJPAR0026861	ASHYC884-08	08-SRNP-3280	BOLD:AAA2445	395	0	3	JQ849969	0	No	Pseudapanteles	Pseudapanteles margaritapenonae	Daniel H. Janzen	djanzen@sas.upenn.edu	malaise-trapped	08-SRNP-3280 | malaise-trapped	D.H.Janzen&W.Hallwachs		Costa Rica	Alajuela	Area de Conservacion Guanacaste	Sector San Cristobal	Rio Blanco Abajo	10.9004	-85.3725	500
DHJPAR0027075	ASHYD101-08	08-SRNP-3494	BOLD:AAA6668	655	1	2	JQ854327	0	Yes	Pseudapanteles	Pseudapanteles christianafigueresae	Daniel H. Janzen	djanzen@sas.upenn.edu	malaise-trapped	08-SRNP-3494 | malaise-trapped	D.H.Janzen&W.Hallwachs		Costa Rica	Alajuela	Area de Conservacion Guanacaste	Sector San Cristobal	Rio Blanco Abajo	10.9004	-85.3725	500
DHJPAR0027183	ASHYD209-08	08-SRNP-3602	BOLD:AAA2445	571	1	2	JQ852088	0	Yes	Pseudapanteles	Pseudapanteles margaritapenonae	Daniel H. Janzen	djanzen@sas.upenn.edu	malaise-trapped	08-SRNP-3602 | malaise-trapped	D.H.Janzen&W.Hallwachs		Costa Rica	Alajuela	Area de Conservacion Guanacaste	Sector San Cristobal	Rio Blanco Abajo	10.9004	-85.3725	500
DHJPAR0027392	ASHYD418-08	08-SRNP-3811	BOLD:AAA6668	628	3	2	JQ852050	0	Yes	Pseudapanteles	Pseudapanteles christianafigueresae			malaise-trapped	08-SRNP-3811 | malaise-trapped	D.H.Janzen&W.Hallwachs		Costa Rica	Alajuela	Area de Conservacion Guanacaste	Sector San Cristobal	Rio Blanco Abajo	10.9004	-85.3725	500
DHJPAR0027403	ASHYD429-08	08-SRNP-3822	BOLD:AAA2445	657	0	2	JQ854084	0	Yes	Pseudapanteles	Pseudapanteles margaritapenonae	Daniel H. Janzen	djanzen@sas.upenn.edu	malaise-trapped	08-SRNP-3822 | malaise-trapped	D.H.Janzen&W.Hallwachs		Costa Rica	Alajuela	Area de Conservacion Guanacaste	Sector San Cristobal	Rio Blanco Abajo	10.9004	-85.3725	500
DHJPAR0027591	ASHYD617-08	08-SRNP-3937	BOLD:AAA6668	620	0	1	JQ847474	0	No	Pseudapanteles	Pseudapanteles christianafigueresae	Daniel H. Janzen	djanzen@sas.upenn.edu	malaise-trapped	08-SRNP-3937 | malaise-trapped	D.H.Janzen&W.Hallwachs		Costa Rica	Alajuela	Area de Conservacion Guanacaste	Sector San Cristobal	Potrero Argentina	10.8902	-85.388	520
DHJPAR0027663	ASHYD689-08	08-SRNP-3961	BOLD:AAA6668	621	2	2	JQ847678	0	Yes	Pseudapanteles	Pseudapanteles christianafigueresae	Daniel H. Janzen	djanzen@sas.upenn.edu	malaise-trapped	08-SRNP-3961 | malaise-trapped	D.H.Janzen&W.Hallwachs		Costa Rica	Alajuela	Area de Conservacion Guanacaste	Sector San Cristobal	Bosque Trampa Malaise	10.8628	-85.3846	815
DHJPAR0031209	ASHYG470-10	08-SRNP-38119	BOLD:AAK9737	658	0	2	HQ549971	0	Yes	Pseudapanteles	Pseudapanteles analorenaguevarae	Daniel H. Janzen	djanzen@sas.upenn.edu	malaise-trapped	08-SRNP-38119 | malaise-trapped	D.H.Janzen&W.Hallwachs		Costa Rica	Guanacaste	Area de Conservacion Guanacaste	Sector Cacao	Sendero Circular	10.9271	-85.4668	1185
DHJPAR0031268	ASHYG529-10	08-SRNP-38178	BOLD:AAK9737	658	0	2	HQ550028	0	Yes	Pseudapanteles	Pseudapanteles analorenaguevarae	Daniel H. Janzen	djanzen@sas.upenn.edu	malaise-trapped	08-SRNP-38178 | malaise-trapped	D.H.Janzen&W.Hallwachs		Costa Rica	Guanacaste	Area de Conservacion Guanacaste	Sector Cacao	Sendero Circular	10.9271	-85.4668	1185
DHJPAR0031297	ASHYG558-10	08-SRNP-38207	BOLD:AAZ6842	621	3	3	JQ576067	0	Yes	Pseudapanteles	Pseudapanteles christianafigueresae			malaise-trapped	08-SRNP-38207 | malaise-trapped	D.H.Janzen&W.Hallwachs		Costa Rica	Guanacaste	Area de Conservacion Guanacaste	Sector Cacao	Sendero Arenales	10.9247	-85.4674	1080
DHJPAR0031316	ASHYG577-10	08-SRNP-38226	BOLD:AAE0922	658	0	2	HQ550071	0	Yes	Pseudapanteles	Pseudapanteles alvaroumanai	Daniel H. Janzen	djanzen@sas.upenn.edu	malaise-trapped	08-SRNP-38226 | malaise-trapped	D.H.Janzen&W.Hallwachs		Costa Rica	Guanacaste	Area de Conservacion Guanacaste	Sector Cacao	Sendero Arenales	10.9247	-85.4674	1080
DHJPAR0031346	ASHYG607-10	08-SRNP-38256	BOLD:AAE0922	658	0	2	HQ550095	0	Yes	Pseudapanteles	Pseudapanteles alvaroumanai	Daniel H. Janzen	djanzen@sas.upenn.edu	malaise-trapped	08-SRNP-38256 | malaise-trapped	D.H.Janzen&W.Hallwachs		Costa Rica	Guanacaste	Area de Conservacion Guanacaste	Sector Cacao	Sendero Arenales	10.9247	-85.4674	1080
DHJPAR0052246	ASHYH1358-13	DHJPAR0052246	BOLD:AAE8275	658	0	2	KJ840804	0	Yes	Pseudapanteles	Pseudapanteles ruficolis	Daniel H. Janzen	djanzen@sas.upenn.edu					Costa Rica
DHJPAR0052908	ASHYM2262-13	13-SRNP-76588	BOLD:AAE8275	658	0	2	KJ840801	0	Yes	Pseudapanteles	Pseudapanteles ruficolis	Daniel H. Janzen	djanzen@sas.upenn.edu	Desmia ufeus	Crambidae	Cirilo Umana	29-Jun-2013	Costa Rica	Guanacaste	Area de Conservacion Guanacaste	Sector Rincon Rain Forest	Quebrada Bambu
DHJPAR0045346	ACGAZ567-11	11-SRNP-20786	BOLD:ABX4834	656	2	2	KJ840811	0	Yes	Pseudapanteles	Pseudapanteles teophilodelatorrei	Daniel H. Janzen	djanzen@sas.upenn.edu	see description	11-SRNP-20786 | Elachistidae	Roster Moraga	17-May-2011	Costa Rica	Guanacaste	Area de Conservacion Guanacaste	Sector El Hacha	Quebrada La Leona
DHJPAR0012576	ASBD083-07	99-SRNP-18904	BOLD:AAE8274	657	0	2	JQ847957	0	Yes	Pseudapanteles	Pseudapanteles carlosrodriguezi	Daniel H. Janzen	djanzen@sas.upenn.edu	malaise-trapped	99-SRNP-18904 | malaise-trapped	D.H.Janzen&W.Hallwachs		Costa Rica	Guanacaste	Area de Conservacion Guanacaste	Sector El Hacha	Sendero Bejuquilla	11.03	-85.527	280
DHJPAR0013545	ASBD410-07	99-SRNP-19016	BOLD:AAE8274	657	0	2	JQ855470	0	Yes	Pseudapanteles	Pseudapanteles carlosrodriguezi	Daniel H. Janzen	djanzen@sas.upenn.edu	malaise-trapped	99-SRNP-19016 | malaise-trapped	D.H.Janzen&W.Hallwachs		Costa Rica	Guanacaste	Area de Conservacion Guanacaste	Sector Santa Rosa	Bosque San Emilio	10.8439	-85.6138	300
DHJPAR0013250	ASBRD210-07	07-SRNP-15043	BOLD:AAB2826	657	0	2	JQ854627	0	Yes	Pseudapanteles	Pseudapanteles rosemarykarpinskiae	Daniel H. Janzen	djanzen@sas.upenn.edu	yellow pan-trapped	07-SRNP-15043 | yellow pan-trapped	A. R. Deans		Costa Rica	Guanacaste	Area de Conservacion Guanacaste	Sector Santa Rosa	Bosque San Emilio	10.8439	-85.6138	300
DHJPAR0013244	ASBRD216-07	07-SRNP-15049	BOLD:AAB2826	656	1	2	JQ851149	0	Yes	Pseudapanteles	Pseudapanteles rosemarykarpinskiae	Daniel H. Janzen	djanzen@sas.upenn.edu	yellow pan-trapped	07-SRNP-15049 | yellow pan-trapped	A. R. Deans		Costa Rica	Guanacaste	Area de Conservacion Guanacaste	Sector Santa Rosa	Bosque San Emilio	10.8439	-85.6138	300
DHJPAR0013426	ASBRD262-07	00-SRNP-23955	BOLD:AAA6667	657	0	2	JQ848186	0	Yes	Pseudapanteles	Pseudapanteles raulsolorzanoi	Daniel H. Janzen	djanzen@sas.upenn.edu	malaise-trapped	00-SRNP-23955 | malaise-trapped	D.H.Janzen&W.Hallwachs		Costa Rica	Guanacaste	Area de Conservacion Guanacaste	Sector Santa Rosa	Bosque Humedo	10.8514	-85.608	290
DHJPAR0013416	ASBRD295-07	00-SRNP-24003	BOLD:AAA6667	657	0	2	JQ846576	0	Yes	Pseudapanteles	Pseudapanteles raulsolorzanoi	Daniel H. Janzen	djanzen@sas.upenn.edu	malaise-trapped	00-SRNP-24003 | malaise-trapped	D.H.Janzen&W.Hallwachs		Costa Rica	Guanacaste	Area de Conservacion Guanacaste	Sector Santa Rosa	Bosque Humedo	10.8514	-85.608	290
DHJPAR0025827	ASHYB166-08	07-SRNP-67289	BOLD:AAA2445	656	1	2	JQ854841	0	Yes	Pseudapanteles	Pseudapanteles margaritapenonae	Daniel H. Janzen	djanzen@sas.upenn.edu	malaise-trapped	07-SRNP-67289 | malaise-trapped	D.H.Janzen&W.Hallwachs		Costa Rica	Alajuela	Area de Conservacion Guanacaste	Sector San Cristobal	Estacion San Gerardo	10.8801	-85.3889	575
DHJPAR0026289	ASHYC312-08	07-SRNP-67594	BOLD:AAA2445	657	0	2	JQ852889	0	Yes	Pseudapanteles	Pseudapanteles margaritapenonae	Daniel H. Janzen	djanzen@sas.upenn.edu	malaise-trapped	07-SRNP-67594 | malaise-trapped	D.H.Janzen&W.Hallwachs		Costa Rica	Alajuela	Area de Conservacion Guanacaste	Sector San Cristobal	Rio Blanco Abajo	10.9004	-85.3725	500
DHJPAR0026806	ASHYC829-08	08-SRNP-3225	BOLD:AAA2445	657	0	2	JQ849171	0	Yes	Pseudapanteles	Pseudapanteles margaritapenonae	Daniel H. Janzen	djanzen@sas.upenn.edu	malaise-trapped	08-SRNP-3225 | malaise-trapped	D.H.Janzen&W.Hallwachs		Costa Rica	Alajuela	Area de Conservacion Guanacaste	Sector San Cristobal	Rio Blanco Abajo	10.9004	-85.3725	500
DHJPAR0026822	ASHYC845-08	08-SRNP-3241	BOLD:AAA2445	617	0	2	JQ848924	0	Yes	Pseudapanteles	Pseudapanteles margaritapenonae	Daniel H. Janzen	djanzen@sas.upenn.edu	malaise-trapped	08-SRNP-3241 | malaise-trapped	D.H.Janzen&W.Hallwachs		Costa Rica	Alajuela	Area de Conservacion Guanacaste	Sector San Cristobal	Rio Blanco Abajo	10.9004	-85.3725	500
DHJPAR0026973	ASHYC996-08	08-SRNP-3392	BOLD:AAA2445	628	0	2	JQ851869	0	Yes	Pseudapanteles	Pseudapanteles margaritapenonae	Daniel H. Janzen	djanzen@sas.upenn.edu	malaise-trapped	08-SRNP-3392 | malaise-trapped	D.H.Janzen&W.Hallwachs		Costa Rica	Alajuela	Area de Conservacion Guanacaste	Sector San Cristobal	Rio Blanco Abajo	10.9004	-85.3725	500
DHJPAR0027093	ASHYD119-08	08-SRNP-3512	BOLD:AAA2445	627	1	2	JQ852263	0	Yes	Pseudapanteles	Pseudapanteles margaritapenonae	Daniel H. Janzen	djanzen@sas.upenn.edu	malaise-trapped	08-SRNP-3512 | malaise-trapped	D.H.Janzen&W.Hallwachs		Costa Rica	Alajuela	Area de Conservacion Guanacaste	Sector San Cristobal	Rio Blanco Abajo	10.9004	-85.3725	500
DHJPAR0027094	ASHYD120-08	08-SRNP-3513	BOLD:AAA2445	576	0	2	JQ855184	0	Yes	Pseudapanteles	Pseudapanteles margaritapenonae	Daniel H. Janzen	djanzen@sas.upenn.edu	malaise-trapped	08-SRNP-3513 | malaise-trapped	D.H.Janzen&W.Hallwachs		Costa Rica	Alajuela	Area de Conservacion Guanacaste	Sector San Cristobal	Rio Blanco Abajo	10.9004	-85.3725	500
DHJPAR0031764	ASHYD1688-10	08-SRNP-76205	BOLD:AAF6107	622	0	2	HQ548899	0	Yes	Pseudapanteles	Pseudapanteles alfiopivai	Daniel H. Janzen	djanzen@sas.upenn.edu	malaise-trapped	08-SRNP-76205 | malaise-trapped	D.H.Janzen&W.Hallwachs		Costa Rica	Guanacaste	Area de Conservacion Guanacaste	Sector Santa Rosa	Area Administrativa	10.8376	-85.6187	295
DHJPAR0027312	ASHYD338-08	08-SRNP-3731	BOLD:AAA2445	631	0	1	JQ855458	0	No	Pseudapanteles	Pseudapanteles margaritapenonae	Daniel H. Janzen	djanzen@sas.upenn.edu	malaise-trapped	08-SRNP-3731 | malaise-trapped	D.H.Janzen&W.Hallwachs		Costa Rica	Alajuela	Area de Conservacion Guanacaste	Sector San Cristobal	Rio Blanco Abajo	10.9004	-85.3725	500
DHJPAR0027432	ASHYD458-08	08-SRNP-3851	BOLD:AAA2445	637	0	3	JQ853685	0	Yes	Pseudapanteles	Pseudapanteles margaritapenonae	Daniel H. Janzen	djanzen@sas.upenn.edu	malaise-trapped	08-SRNP-3851 | malaise-trapped	D.H.Janzen&W.Hallwachs		Costa Rica	Alajuela	Area de Conservacion Guanacaste	Sector San Cristobal	Rio Blanco Abajo	10.9004	-85.3725	500
DHJPAR0027452	ASHYD478-08	08-SRNP-3871	BOLD:AAA2445	636	0	2	JQ854446	0	Yes	Pseudapanteles	Pseudapanteles margaritapenonae	Daniel H. Janzen	djanzen@sas.upenn.edu	malaise-trapped	08-SRNP-3871 | malaise-trapped	D.H.Janzen&W.Hallwachs		Costa Rica	Alajuela	Area de Conservacion Guanacaste	Sector San Cristobal	Rio Blanco Abajo	10.9004	-85.3725	500
DHJPAR0027656	ASHYD682-08	08-SRNP-3954	BOLD:AAA6668	616	5	2	JQ849950	0	Yes	Pseudapanteles	Pseudapanteles christianafigueresae	Daniel H. Janzen	djanzen@sas.upenn.edu	malaise-trapped	08-SRNP-3954 | malaise-trapped	D.H.Janzen&W.Hallwachs		Costa Rica	Alajuela	Area de Conservacion Guanacaste	Sector San Cristobal	Bosque Trampa Malaise	10.8628	-85.3846	815
DHJPAR0027667	ASHYD693-08	08-SRNP-3965	BOLD:AAA6668	623	1	2	JQ853451	0	Yes	Pseudapanteles	Pseudapanteles christianafigueresae	Daniel H. Janzen	djanzen@sas.upenn.edu	malaise-trapped	08-SRNP-3965 | malaise-trapped	D.H.Janzen&W.Hallwachs		Costa Rica	Alajuela	Area de Conservacion Guanacaste	Sector San Cristobal	Bosque Trampa Malaise	10.8628	-85.3846	815
DHJPAR0033734	ASHYG004-10	08-SRNP-37653	BOLD:AAE0922	658	0	2	HQ549583	0	Yes	Pseudapanteles	Pseudapanteles alvaroumanai	Daniel H. Janzen	djanzen@sas.upenn.edu	malaise-trapped	08-SRNP-37653 | malaise-trapped	D.H.Janzen&W.Hallwachs		Costa Rica	Guanacaste	Area de Conservacion Guanacaste	Sector Cacao	Cerro Pedregal	10.9277	-85.4745	1080
DHJPAR0031335	ASHYG596-10	08-SRNP-38245	BOLD:AAE0922	630	0	2	HQ550086	0	Yes	Pseudapanteles	Pseudapanteles alvaroumanai	Daniel H. Janzen	djanzen@sas.upenn.edu	malaise-trapped	08-SRNP-38245 | malaise-trapped	D.H.Janzen&W.Hallwachs		Costa Rica	Guanacaste	Area de Conservacion Guanacaste	Sector Cacao	Sendero Arenales	10.9247	-85.4674	1080
DHJPAR0031347	ASHYG608-10	08-SRNP-38257	BOLD:AAK9737	658	0	2	HQ550096	0	Yes	Pseudapanteles	Pseudapanteles analorenaguevarae			malaise-trapped	08-SRNP-38257 | malaise-trapped	D.H.Janzen&W.Hallwachs		Costa Rica	Guanacaste	Area de Conservacion Guanacaste	Sector Cacao	Sendero Arenales	10.9247	-85.4674	1080
DHJPAR0031408	ASHYG669-10	08-SRNP-38318	BOLD:AAE0922	658	0	2	HQ550151	0	Yes	Pseudapanteles	Pseudapanteles alvaroumanai	Daniel H. Janzen	djanzen@sas.upenn.edu	malaise-trapped	08-SRNP-38318 | malaise-trapped	D.H.Janzen&W.Hallwachs		Costa Rica	Guanacaste	Area de Conservacion Guanacaste	Sector Cacao	Cerro Pedregal	10.9277	-85.4745	1080
DHJPAR0031583	ASHYG844-10	08-SRNP-76024	BOLD:AAB2826	658	0	2	HQ550283	0	Yes	Pseudapanteles	Pseudapanteles rosemarykarpinskiae	Daniel H. Janzen	djanzen@sas.upenn.edu	malaise-trapped	08-SRNP-76024 | malaise-trapped	D.H.Janzen&W.Hallwachs		Costa Rica	Guanacaste	Area de Conservacion Guanacaste	Sector Santa Rosa	Area Administrativa	10.8376	-85.6187	295
DHJPAR0050032	ACGAZ1346-12	12-SRNP-71701	BOLD:ACC0954	658	0	2	KJ840814	0	Yes	Pseudapanteles	Pseudapanteles Janzen02	Daniel H. Janzen	djanzen@sas.upenn.edu	same as 12-SRNP-71591	Crambidae	Ricardo Calero	22-Jul-2012	Costa Rica	Guanacaste	Area de Conservacion Guanacaste	Sector Pitilla	Medrano
DHJPAR0013146	ASBRD057-07	99-SRNP-18982	BOLD:AAB2826	655	2	2	JQ847665	0	Yes	Pseudapanteles	Pseudapanteles rosemarykarpinskiae	Daniel H. Janzen	djanzen@sas.upenn.edu	malaise-trapped	99-SRNP-18982 | malaise-trapped	D.H.Janzen&W.Hallwachs		Costa Rica	Guanacaste	Area de Conservacion Guanacaste	Sector Santa Rosa	Bosque San Emilio	10.8439	-85.6138	300
DHJPAR0013150	ASBRD063-07	99-SRNP-18989	BOLD:AAB2826	655	2	2	JQ852876	0	Yes	Pseudapanteles	Pseudapanteles rosemarykarpinskiae	Daniel H. Janzen	djanzen@sas.upenn.edu	malaise-trapped	99-SRNP-18989 | malaise-trapped	D.H.Janzen&W.Hallwachs		Costa Rica	Guanacaste	Area de Conservacion Guanacaste	Sector Santa Rosa	Bosque San Emilio	10.8439	-85.6138	300
DHJPAR0013144	ASBRD113-07	99-SRNP-19044	BOLD:AAK9744	656	1	2	JQ851940	0	Yes	Pseudapanteles	Pseudapanteles hernanbravoi	Daniel H. Janzen	djanzen@sas.upenn.edu	malaise-trapped	99-SRNP-19044 | malaise-trapped	D.H.Janzen&W.Hallwachs		Costa Rica	Guanacaste	Area de Conservacion Guanacaste	Sector Santa Rosa	Bosque San Emilio	10.8439	-85.6138	300
DHJPAR0013423	ASBRD245-07	99-SRNP-19090	BOLD:AAE0922	631	0	2	JQ853825	0	Yes	Pseudapanteles	Pseudapanteles alvaroumanai	Daniel H. Janzen	djanzen@sas.upenn.edu	malaise-trapped	99-SRNP-19090 | malaise-trapped	D.H.Janzen&W.Hallwachs		Costa Rica	Guanacaste	Area de Conservacion Guanacaste	Sector Santa Rosa	Bosque Humedo	10.8514	-85.608	290
DHJPAR0024756	ASHYA095-08	08-SRNP-12190	BOLD:AAB2826	657	0	2	JQ847522	0	Yes	Pseudapanteles	Pseudapanteles rosemarykarpinskiae	Daniel H. Janzen	djanzen@sas.upenn.edu	yellow pan-trapped	08-SRNP-12190 | yellow pan-trapped	Andy Deans		Costa Rica	Guanacaste	Area de Conservacion Guanacaste	Sector Santa Rosa	Area Administrativa	10.8376	-85.6187	295
DHJPAR0025355	ASHYA694-08	07-SRNP-66817	BOLD:AAA2445	657	0	2	JQ848170	0	Yes	Pseudapanteles	Pseudapanteles margaritapenonae	Daniel H. Janzen	djanzen@sas.upenn.edu	malaise-trapped	07-SRNP-66817 | malaise-trapped	D.H.Janzen&W.Hallwachs		Costa Rica	Alajuela	Area de Conservacion Guanacaste	Sector San Cristobal	Rio Blanco Abajo	10.9004	-85.3725	500
DHJPAR0025840	ASHYB179-08	07-SRNP-67302	BOLD:AAA2445	656	1	2	JQ851888	0	Yes	Pseudapanteles	Pseudapanteles margaritapenonae	Daniel H. Janzen	djanzen@sas.upenn.edu	malaise-trapped	07-SRNP-67302 | malaise-trapped	D.H.Janzen&W.Hallwachs		Costa Rica	Alajuela	Area de Conservacion Guanacaste	Sector San Cristobal	Estacion San Gerardo	10.8801	-85.3889	575
DHJPAR0026275	ASHYC298-08	08-SRNP-2831	BOLD:AAA2445	623	1	1	JQ851162	0	No	Pseudapanteles	Pseudapanteles margaritapenonae	Daniel H. Janzen	djanzen@sas.upenn.edu	malaise-trapped	08-SRNP-2831 | malaise-trapped	D.H.Janzen&W.Hallwachs		Costa Rica	Alajuela	Area de Conservacion Guanacaste	Sector San Cristobal	Estacion San Gerardo	10.8801	-85.3889	575
DHJPAR0026497	ASHYC520-08	08-SRNP-2916	BOLD:AAA2445	657	0	2	JQ847206	0	Yes	Pseudapanteles	Pseudapanteles margaritapenonae	Daniel H. Janzen	djanzen@sas.upenn.edu	malaise-trapped	08-SRNP-2916 | malaise-trapped	D.H.Janzen&W.Hallwachs		Costa Rica	Alajuela	Area de Conservacion Guanacaste	Sector San Cristobal	Rio Blanco Abajo	10.9004	-85.3725	500
DHJPAR0026556	ASHYC579-08	08-SRNP-2975	BOLD:AAA2445	657	0	2	JQ850375	0	Yes	Pseudapanteles	Pseudapanteles margaritapenonae	Daniel H. Janzen	djanzen@sas.upenn.edu	malaise-trapped	08-SRNP-2975 | malaise-trapped	D.H.Janzen&W.Hallwachs		Costa Rica	Alajuela	Area de Conservacion Guanacaste	Sector San Cristobal	Rio Blanco Abajo	10.9004	-85.3725	500
DHJPAR0026796	ASHYC819-08	08-SRNP-3215	BOLD:AAA2445	657	0	2	JQ853251	0	Yes	Pseudapanteles	Pseudapanteles margaritapenonae	Daniel H. Janzen	djanzen@sas.upenn.edu	malaise-trapped	08-SRNP-3215 | malaise-trapped	D.H.Janzen&W.Hallwachs		Costa Rica	Alajuela	Area de Conservacion Guanacaste	Sector San Cristobal	Rio Blanco Abajo	10.9004	-85.3725	500
DHJPAR0027108	ASHYD134-08	08-SRNP-3527	BOLD:AAA2445	607	2	2	JQ854676	0	Yes	Pseudapanteles	Pseudapanteles margaritapenonae	Daniel H. Janzen	djanzen@sas.upenn.edu	malaise-trapped	08-SRNP-3527 | malaise-trapped	D.H.Janzen&W.Hallwachs		Costa Rica	Alajuela	Area de Conservacion Guanacaste	Sector San Cristobal	Rio Blanco Abajo	10.9004	-85.3725	500
DHJPAR0031749	ASHYD1673-10	08-SRNP-76190	BOLD:AAM9559	658	0	2	HQ548886	0	Yes	Pseudapanteles	Pseudapanteles ottonsolisi			malaise-trapped	08-SRNP-76190 | malaise-trapped	D.H.Janzen&W.Hallwachs		Costa Rica	Guanacaste	Area de Conservacion Guanacaste	Sector Santa Rosa	Area Administrativa	10.8376	-85.6187	295
DHJPAR0027302	ASHYD328-08	08-SRNP-3721	BOLD:AAA2445	631	0	1	JQ855228	0	No	Pseudapanteles	Pseudapanteles margaritapenonae	Daniel H. Janzen	djanzen@sas.upenn.edu	malaise-trapped	08-SRNP-3721 | malaise-trapped	D.H.Janzen&W.Hallwachs		Costa Rica	Alajuela	Area de Conservacion Guanacaste	Sector San Cristobal	Rio Blanco Abajo	10.9004	-85.3725	500
DHJPAR0027646	ASHYD672-08	08-SRNP-3944	BOLD:AAA6668	624	0	1	JQ853087	0	No	Pseudapanteles	Pseudapanteles christianafigueresae	Daniel H. Janzen	djanzen@sas.upenn.edu	malaise-trapped	08-SRNP-3944 | malaise-trapped	D.H.Janzen&W.Hallwachs		Costa Rica	Alajuela	Area de Conservacion Guanacaste	Sector San Cristobal	Bosque Trampa Malaise	10.8628	-85.3846	815
DHJPAR0027661	ASHYD687-08	08-SRNP-3959	BOLD:AAA6668	631	0	2	JQ849938	0	Yes	Pseudapanteles	Pseudapanteles christianafigueresae			malaise-trapped	08-SRNP-3959 | malaise-trapped	D.H.Janzen&W.Hallwachs		Costa Rica	Alajuela	Area de Conservacion Guanacaste	Sector San Cristobal	Bosque Trampa Malaise	10.8628	-85.3846	815
DHJPAR0027669	ASHYD695-08	08-SRNP-3967	BOLD:AAX8357	624	0	1	JQ853689	0	No	Pseudapanteles	Pseudapanteles luisguillermosolisi			malaise-trapped	08-SRNP-3967 | malaise-trapped	D.H.Janzen&W.Hallwachs		Costa Rica	Alajuela	Area de Conservacion Guanacaste	Sector San Cristobal	Bosque Trampa Malaise	10.8628	-85.3846	815
DHJPAR0027683	ASHYD709-08	08-SRNP-3981		603	25	2	JQ847727	0	No	Pseudapanteles	Pseudapanteles christianafigueresae	Daniel H. Janzen	djanzen@sas.upenn.edu	malaise-trapped	08-SRNP-3981 | malaise-trapped	D.H.Janzen&W.Hallwachs		Costa Rica	Alajuela	Area de Conservacion Guanacaste	Sector San Cristobal	Bosque Trampa Malaise	10.8628	-85.3846	815
DHJPAR0027690	ASHYD716-08	08-SRNP-3988	BOLD:AAA6668	622	1	2	JQ852383	0	Yes	Pseudapanteles	Pseudapanteles christianafigueresae	Daniel H. Janzen	djanzen@sas.upenn.edu	malaise-trapped	08-SRNP-3988 | malaise-trapped	D.H.Janzen&W.Hallwachs		Costa Rica	Alajuela	Area de Conservacion Guanacaste	Sector San Cristobal	Bosque Trampa Malaise	10.8628	-85.3846	815
DHJPAR0027699	ASHYD725-08	08-SRNP-3997		609	13	2	JQ853029	0	No	Pseudapanteles	Pseudapanteles christianafigueresae	Daniel H. Janzen	djanzen@sas.upenn.edu	malaise-trapped	08-SRNP-3997 | malaise-trapped	D.H.Janzen&W.Hallwachs		Costa Rica	Alajuela	Area de Conservacion Guanacaste	Sector San Cristobal	Bosque Trampa Malaise	10.8628	-85.3846	815
DHJPAR0033748	ASHYG018-10	08-SRNP-37667	BOLD:AAE0922	658	0	2	HQ549595	0	Yes	Pseudapanteles	Pseudapanteles alvaroumanai	Daniel H. Janzen	djanzen@sas.upenn.edu	malaise-trapped	08-SRNP-37667 | malaise-trapped	D.H.Janzen&W.Hallwachs		Costa Rica	Guanacaste	Area de Conservacion Guanacaste	Sector Cacao	Cerro Pedregal	10.9277	-85.4745	1080
DHJPAR0033768	ASHYG038-10	08-SRNP-37687	BOLD:AAE0922	658	0	2	HQ549613	0	Yes	Pseudapanteles	Pseudapanteles alvaroumanai	Daniel H. Janzen	djanzen@sas.upenn.edu	malaise-trapped	08-SRNP-37687 | malaise-trapped	D.H.Janzen&W.Hallwachs		Costa Rica	Guanacaste	Area de Conservacion Guanacaste	Sector Cacao	Cerro Pedregal	10.9277	-85.4745	1080
DHJPAR0031396	ASHYG657-10	08-SRNP-38306	BOLD:AAE0922	658	0	2	HQ550139	0	Yes	Pseudapanteles	Pseudapanteles alvaroumanai	Daniel H. Janzen	djanzen@sas.upenn.edu	malaise-trapped	08-SRNP-38306 | malaise-trapped	D.H.Janzen&W.Hallwachs		Costa Rica	Guanacaste	Area de Conservacion Guanacaste	Sector Cacao	Cerro Pedregal	10.9277	-85.4745	1080
DHJPAR0052317	ASHYH1429-13	DHJPAR0052317	BOLD:ACB2343	658	0	2	KJ840820	0	Yes	Pseudapanteles	Pseudapanteles Janzen02	Daniel H. Janzen	djanzen@sas.upenn.edu					Costa Rica
DHJPAR0013216	ASBRD146-07	00-SRNP-23879	BOLD:AAB2826	657	0	2	JQ852467	0	Yes	Pseudapanteles	Pseudapanteles rosemarykarpinskiae	Daniel H. Janzen	djanzen@sas.upenn.edu	malaise-trapped	00-SRNP-23879 | malaise-trapped	D.H.Janzen&W.Hallwachs		Costa Rica	Guanacaste	Area de Conservacion Guanacaste	Sector Santa Rosa	Bosque San Emilio	10.8439	-85.6138	300
DHJPAR0013217	ASBRD183-07	00-SRNP-23926	BOLD:AAE8274	656	1	2	JQ849832	0	Yes	Pseudapanteles	Pseudapanteles carlosrodriguezi			malaise-trapped	00-SRNP-23926 | malaise-trapped	D.H.Janzen&W.Hallwachs		Costa Rica	Guanacaste	Area de Conservacion Guanacaste	Sector Santa Rosa	Bosque San Emilio	10.8439	-85.6138	300
DHJPAR0013128	ASBRD241-07	99-SRNP-19082	BOLD:AAF6107	625	2	2	JQ847833	0	Yes	Pseudapanteles	Pseudapanteles alfiopivai	Daniel H. Janzen	djanzen@sas.upenn.edu	malaise-trapped	99-SRNP-19082 | malaise-trapped	D.H.Janzen&W.Hallwachs		Costa Rica	Guanacaste	Area de Conservacion Guanacaste	Sector Santa Rosa	Bosque Humedo	10.8514	-85.608	290
DHJPAR0024807	ASHYA146-08	07-SRNP-66269	BOLD:AAA2445	657	0	2	JQ847224	0	Yes	Pseudapanteles	Pseudapanteles margaritapenonae	Daniel H. Janzen	djanzen@sas.upenn.edu	malaise-trapped	07-SRNP-66269 | malaise-trapped	D.H.Janzen&W.Hallwachs		Costa Rica	Alajuela	Area de Conservacion Guanacaste	Sector San Cristobal	Rio Blanco Abajo	10.9004	-85.3725	500
DHJPAR0025110	ASHYA449-08	07-SRNP-66572	BOLD:AAA2445	629	0	2	JQ851211	0	Yes	Pseudapanteles	Pseudapanteles margaritapenonae	Daniel H. Janzen	djanzen@sas.upenn.edu	malaise-trapped	07-SRNP-66572 | malaise-trapped	D.H.Janzen&W.Hallwachs		Costa Rica	Alajuela	Area de Conservacion Guanacaste	Sector San Cristobal	Rio Blanco Abajo	10.9004	-85.3725	500
DHJPAR0025178	ASHYA517-08	07-SRNP-66640	BOLD:AAA2445	657	0	2	JQ846802	0	Yes	Pseudapanteles	Pseudapanteles margaritapenonae	Daniel H. Janzen	djanzen@sas.upenn.edu	malaise-trapped	07-SRNP-66640 | malaise-trapped	D.H.Janzen&W.Hallwachs		Costa Rica	Alajuela	Area de Conservacion Guanacaste	Sector San Cristobal	Rio Blanco Abajo	10.9004	-85.3725	500
DHJPAR0026592	ASHYC615-08	08-SRNP-3011	BOLD:AAA2445	657	0	0	JQ853717	0	No	Pseudapanteles	Pseudapanteles margaritapenonae	Daniel H. Janzen	djanzen@sas.upenn.edu	malaise-trapped	08-SRNP-3011 | malaise-trapped	D.H.Janzen&W.Hallwachs		Costa Rica	Alajuela	Area de Conservacion Guanacaste	Sector San Cristobal	Rio Blanco Abajo	10.9004	-85.3725	500
DHJPAR0026672	ASHYC695-08	08-SRNP-3091	BOLD:AAA2445	656	1	0	JQ848402	0	No	Pseudapanteles	Pseudapanteles margaritapenonae	Daniel H. Janzen	djanzen@sas.upenn.edu	malaise-trapped	08-SRNP-3091 | malaise-trapped	D.H.Janzen&W.Hallwachs		Costa Rica	Alajuela	Area de Conservacion Guanacaste	Sector San Cristobal	Rio Blanco Abajo	10.9004	-85.3725	500
DHJPAR0026711	ASHYC734-08	08-SRNP-3130	BOLD:AAA2445	655	2	0	JQ848130	0	No	Pseudapanteles	Pseudapanteles margaritapenonae	Daniel H. Janzen	djanzen@sas.upenn.edu	malaise-trapped	08-SRNP-3130 | malaise-trapped	D.H.Janzen&W.Hallwachs		Costa Rica	Alajuela	Area de Conservacion Guanacaste	Sector San Cristobal	Rio Blanco Abajo	10.9004	-85.3725	500
DHJPAR0026745	ASHYC768-08	08-SRNP-3164	BOLD:AAA2445	657	0	0	JQ854364	0	No	Pseudapanteles	Pseudapanteles margaritapenonae	Daniel H. Janzen	djanzen@sas.upenn.edu	malaise-trapped	08-SRNP-3164 | malaise-trapped	D.H.Janzen&W.Hallwachs		Costa Rica	Alajuela	Area de Conservacion Guanacaste	Sector San Cristobal	Rio Blanco Abajo	10.9004	-85.3725	500
DHJPAR0026786	ASHYC809-08	08-SRNP-3205	BOLD:AAA2445	656	1	2	JQ852034	0	Yes	Pseudapanteles	Pseudapanteles margaritapenonae	Daniel H. Janzen	djanzen@sas.upenn.edu	malaise-trapped	08-SRNP-3205 | malaise-trapped	D.H.Janzen&W.Hallwachs		Costa Rica	Alajuela	Area de Conservacion Guanacaste	Sector San Cristobal	Rio Blanco Abajo	10.9004	-85.3725	500
DHJPAR0026943	ASHYC966-08	08-SRNP-3362	BOLD:AAA2445	605	0	1	JQ846668	0	No	Pseudapanteles	Pseudapanteles margaritapenonae	Daniel H. Janzen	djanzen@sas.upenn.edu	malaise-trapped	08-SRNP-3362 | malaise-trapped	D.H.Janzen&W.Hallwachs		Costa Rica	Alajuela	Area de Conservacion Guanacaste	Sector San Cristobal	Rio Blanco Abajo	10.9004	-85.3725	500
DHJPAR0026981	ASHYD007-08	08-SRNP-3400	BOLD:AAA2445	657	0	2	JQ852090	0	Yes	Pseudapanteles	Pseudapanteles margaritapenonae	Daniel H. Janzen	djanzen@sas.upenn.edu	malaise-trapped	08-SRNP-3400 | malaise-trapped	D.H.Janzen&W.Hallwachs		Costa Rica	Alajuela	Area de Conservacion Guanacaste	Sector San Cristobal	Rio Blanco Abajo	10.9004	-85.3725	500
DHJPAR0027129	ASHYD155-08	08-SRNP-3548	BOLD:AAA2445	651	0	2	JQ851552	0	Yes	Pseudapanteles	Pseudapanteles margaritapenonae	Daniel H. Janzen	djanzen@sas.upenn.edu	malaise-trapped	08-SRNP-3548 | malaise-trapped	D.H.Janzen&W.Hallwachs		Costa Rica	Alajuela	Area de Conservacion Guanacaste	Sector San Cristobal	Rio Blanco Abajo	10.9004	-85.3725	500
DHJPAR0038402	ASHYD1975-10	09-SRNP-73086	BOLD:AAM1694	658	0	2	HQ549146	0	Yes	Pseudapanteles	Pseudapanteles Whitfield24			Antaeotricha zelleriEPR02	09-SRNP-73086 | Elachistidae		31-Oct-2009	Costa Rica	Guanacaste	Area de Conservacion Guanacaste	Sector Pitilla	Manguera	10.996	-85.398	470
DHJPAR0027203	ASHYD229-08	08-SRNP-3622	BOLD:AAA2445	594	0	2	JQ852162	0	Yes	Pseudapanteles	Pseudapanteles margaritapenonae	Daniel H. Janzen	djanzen@sas.upenn.edu	malaise-trapped	08-SRNP-3622 | malaise-trapped	D.H.Janzen&W.Hallwachs		Costa Rica	Alajuela	Area de Conservacion Guanacaste	Sector San Cristobal	Rio Blanco Abajo	10.9004	-85.3725	500
DHJPAR0027385	ASHYD411-08	08-SRNP-3804	BOLD:AAA2445	640	0	2	JQ850479	0	Yes	Pseudapanteles	Pseudapanteles margaritapenonae	Daniel H. Janzen	djanzen@sas.upenn.edu	malaise-trapped	08-SRNP-3804 | malaise-trapped	D.H.Janzen&W.Hallwachs		Costa Rica	Alajuela	Area de Conservacion Guanacaste	Sector San Cristobal	Rio Blanco Abajo	10.9004	-85.3725	500
DHJPAR0027401	ASHYD427-08	08-SRNP-3820	BOLD:AAA2445	657	0	2	JQ851392	0	Yes	Pseudapanteles	Pseudapanteles margaritapenonae	Daniel H. Janzen	djanzen@sas.upenn.edu	malaise-trapped	08-SRNP-3820 | malaise-trapped	D.H.Janzen&W.Hallwachs		Costa Rica	Alajuela	Area de Conservacion Guanacaste	Sector San Cristobal	Rio Blanco Abajo	10.9004	-85.3725	500
DHJPAR0027627	ASHYD653-08	07-SRNP-67831		302	3	3	JQ849350	0	No	Pseudapanteles	Pseudapanteles christianafigueresae			malaise-trapped	07-SRNP-67831 | malaise-trapped	D.H.Janzen&W.Hallwachs		Costa Rica	Alajuela	Area de Conservacion Guanacaste	Sector San Cristobal	Bosque Trampa Malaise	10.8628	-85.3846	815
DHJPAR0027657	ASHYD683-08	08-SRNP-3955	BOLD:AAA6668	509	0	1	JQ851649	0	No	Pseudapanteles	Pseudapanteles christianafigueresae	Daniel H. Janzen	djanzen@sas.upenn.edu	malaise-trapped	08-SRNP-3955 | malaise-trapped	D.H.Janzen&W.Hallwachs		Costa Rica	Alajuela	Area de Conservacion Guanacaste	Sector San Cristobal	Bosque Trampa Malaise	10.8628	-85.3846	815
DHJPAR0040498	ASHYE2634-11	10-SRNP-2478	BOLD:AAM1093	658	0	2	JQ574924	0	Yes	Pseudapanteles	Pseudapanteles oscarariasi	Daniel H. Janzen	djanzen@sas.upenn.edu	Antaeotricha Janzen888	10-SRNP-2478 | Elachistidae	Elda Araya	24-Jun-2010	Costa Rica	Alajuela	Area de Conservacion Guanacaste	Sector San Cristobal	Sendero Albergue Crater	10.849	-85.328	980
DHJPAR0031204	ASHYG465-10	08-SRNP-38114	BOLD:AAK9737	658	0	2	HQ549966	0	Yes	Pseudapanteles	Pseudapanteles analorenaguevarae	Daniel H. Janzen	djanzen@sas.upenn.edu	malaise-trapped	08-SRNP-38114 | malaise-trapped	D.H.Janzen&W.Hallwachs		Costa Rica	Guanacaste	Area de Conservacion Guanacaste	Sector Cacao	Sendero Circular	10.9271	-85.4668	1185
DHJPAR0031236	ASHYG497-10	08-SRNP-38146	BOLD:AAK9737	658	0	2	HQ549996	0	Yes	Pseudapanteles	Pseudapanteles analorenaguevarae	Daniel H. Janzen	djanzen@sas.upenn.edu	malaise-trapped	08-SRNP-38146 | malaise-trapped	D.H.Janzen&W.Hallwachs		Costa Rica	Guanacaste	Area de Conservacion Guanacaste	Sector Cacao	Sendero Circular	10.9271	-85.4668	1185
DHJPAR0031321	ASHYG582-10	08-SRNP-38231	BOLD:AAK9737	658	0	2	HQ550075	0	Yes	Pseudapanteles	Pseudapanteles analorenaguevarae	Daniel H. Janzen	djanzen@sas.upenn.edu	malaise-trapped	08-SRNP-38231 | malaise-trapped	D.H.Janzen&W.Hallwachs		Costa Rica	Guanacaste	Area de Conservacion Guanacaste	Sector Cacao	Sendero Arenales	10.9247	-85.4674	1080
DHJPAR0052275	ASHYH1387-13	DHJPAR0052275	BOLD:ACB2343	658	0	2	KJ840812	0	Yes	Pseudapanteles	Pseudapanteles Janzen02	Daniel H. Janzen	djanzen@sas.upenn.edu					Costa Rica
DHJPAR0025702	ASHYB041-08	07-SRNP-67164		576	10	2	JQ849380	0	No	Pseudapanteles	Pseudapanteles christianafigueresae	Daniel H. Janzen	djanzen@sas.upenn.edu	malaise-trapped	07-SRNP-67164 | malaise-trapped	D.H.Janzen&W.Hallwachs		Costa Rica	Alajuela	Area de Conservacion Guanacaste	Sector San Cristobal	Potrero Argentina	10.8902	-85.388	520
DHJPAR0025910	ASHYB249-08	07-SRNP-67372	BOLD:AAA2445	657	0	2	JQ855008	0	Yes	Pseudapanteles	Pseudapanteles margaritapenonae	Daniel H. Janzen	djanzen@sas.upenn.edu	malaise-trapped	07-SRNP-67372 | malaise-trapped	D.H.Janzen&W.Hallwachs		Costa Rica	Alajuela	Area de Conservacion Guanacaste	Sector San Cristobal	Bosque Trampa Malaise	10.8628	-85.3846	815
DHJPAR0026722	ASHYC745-08	08-SRNP-3141	BOLD:AAA2445	657	0	0	JQ852535	0	No	Pseudapanteles	Pseudapanteles margaritapenonae	Daniel H. Janzen	djanzen@sas.upenn.edu	malaise-trapped	08-SRNP-3141 | malaise-trapped	D.H.Janzen&W.Hallwachs		Costa Rica	Alajuela	Area de Conservacion Guanacaste	Sector San Cristobal	Rio Blanco Abajo	10.9004	-85.3725	500
